# Supplementary material for: Erector Spinae Plane Blocks for the Early Analgesia of Rib Fractures in Trauma (ESPEAR): protocol for a multicentre pilot randomised controlled trial with feasibility and embedded qualitative assessment
Source: PubMed Central journal article supplement (PMC9494559; doi:10.1136/bmjopen-2022-062935), 2022-09-21
Supplement: bmjopen-2022-062935.draft_revisions.pdf [file bmjopen-2022-062935.draft_revisions.pdf]

# BMJ Open

BMJ Open is committed to open peer review. As part of this commitment we make the peer review history of every article we publish publicly available.

When an article is published we post the peer reviewers' comments and the authors' responses online. We also post the versions of the paper that were used during peer review. These are the versions that the peer review comments apply to.

The versions of the paper that follow are the versions that were submitted during the peer review process. They are not the versions of record or the final published versions. They should not be cited or distributed as the published version of this manuscript.

BMJ Open is an open access journal and the full, final, typeset and author-corrected version of record of the manuscript is available on our site with no access controls, subscription charges or pay-per-view fees (<http://bmjopen.bmj.com>).

If you have any questions on BMJ Open's open peer review process please email [info.bmjopen@bmj.com](mailto:info.bmjopen@bmj.com)

# BMJ Open

## Erector Spinae Plane blocks for the Early Analgesia of Rib fractures in trauma (ESPEAR): protocol for a multicentre pilot randomised controlled trial with feasibility and embedded qualitative assessment

|                               |                                                                                                                                                                                                                                                                                                                                                                                                                                                                                                                                                                                                                                                                                                                    |
|-------------------------------|--------------------------------------------------------------------------------------------------------------------------------------------------------------------------------------------------------------------------------------------------------------------------------------------------------------------------------------------------------------------------------------------------------------------------------------------------------------------------------------------------------------------------------------------------------------------------------------------------------------------------------------------------------------------------------------------------------------------|
| Journal:                      | <i>BMJ Open</i>                                                                                                                                                                                                                                                                                                                                                                                                                                                                                                                                                                                                                                                                                                    |
| Manuscript ID                 | bmjopen-2022-062935                                                                                                                                                                                                                                                                                                                                                                                                                                                                                                                                                                                                                                                                                                |
| Article Type:                 | Protocol                                                                                                                                                                                                                                                                                                                                                                                                                                                                                                                                                                                                                                                                                                           |
| Date Submitted by the Author: | 15-Mar-2022                                                                                                                                                                                                                                                                                                                                                                                                                                                                                                                                                                                                                                                                                                        |
| Complete List of Authors:     | Hewson, David; Nottingham University Hospitals NHS Trust, Department of Anaesthesia; University of Nottingham<br>Nightingale, Jessica; Nottingham University Hospitals NHS Trust, Trauma and Orthopaedics<br>Ogollah, Reuben; University of Nottingham University Park Campus, Nottingham Clinical Trials Unit<br>Ollivere, Benjamin; University of Nottingham, Trauma Outcomes Group<br>Costa, Matthew; Oxford University, Nuffield Department of Orthopaedics, Rheumatology, and Musculoskeletal Sciences<br>Craxford, Simon; University of Nottingham, Trauma and orthopaedics<br>Bates, Peter; Barts Health NHS Trust<br>Bedforth, Nigel; Nottingham University Hospitals NHS Trust, Department of Anaesthesia |
| Keywords:                     | ANAESTHETICS, TRAUMA MANAGEMENT, PAIN MANAGEMENT, ACCIDENT & EMERGENCY MEDICINE                                                                                                                                                                                                                                                                                                                                                                                                                                                                                                                                                                                                                                    |
|                               |                                                                                                                                                                                                                                                                                                                                                                                                                                                                                                                                                                                                                                                                                                                    |

SCHOLARONE™  
Manuscripts

1  
2  
3 Erector Spinae Plane blocks for the Early Analgesia of Rib fractures in trauma  
4  
5 (ESPEAR): protocol for a multicentre pilot randomised controlled trial with  
6  
7 feasibility and embedded qualitative assessment  
8  
9  
10  
11

12 David W Hewson,<sup>1,2</sup> Jessica Nightingale,<sup>3</sup> Reuben Ogollah,<sup>4</sup> Ben Ollivere,<sup>2,5</sup> Matthew L Costa,<sup>6</sup> Simon Craxford,<sup>5</sup>  
13 Peter Bates,<sup>7</sup> Nigel M Bedforth.<sup>1,2</sup>  
14  
15

16  
17  
18 *1. Department of Anaesthesia, Queen's Medical Centre, Nottingham University Hospitals NHS Trust, NG7 2UH, UK*  
19

20 *2. Anaesthesia and Critical Care, Academic Unit of Injury, Inflammation and Recovery Science, School of Medicine, University*  
21 *of Nottingham, Nottingham NG7 2UH, UK*  
22

23 *3. Department of Orthopaedic Surgery, Queen's Medical Centre, Nottingham University Hospitals NHS Trust, NG7 2UH, UK*  
24

25 *4. Nottingham Clinical Trials Unit, Applied Health Research Building, University Park, University of Nottingham, NG7 2RD, UK*  
26

27 *5. Orthopaedic Trauma Surgery, Academic Unit of Injury, Inflammation and Recovery Science, School of Medicine, University*  
28 *of Nottingham, Nottingham NG7 2UH, UK*  
29

30 *6. Nuffield Department of Orthopaedics, Rheumatology and Musculoskeletal Sciences, University of Oxford, OX3 9DU, UK*  
31

32 *7. Department of Orthopaedic Trauma, Royal London Hospital, Bart's Health, London, E1 1FR.*  
33  
34  
35  
36  
37

38 **Corresponding author**

Dr David Hewson

david.hewson@nottingham.ac.uk

Department of Anaesthesia

C Floor, East Block

Queen's Medical Centre

Nottingham University Hospitals NHS Trust

Nottingham

NG7 2UH

United Kingdom

39  
40  
41  
42  
43  
44  
45  
46  
47  
48  
49  
50  
51  
52  
53  
54  
55  
56 **Word count**

3859 words

## ABSTRACT

### Introduction

Patients with rib fractures commonly experience significant acute pain and are at risk of hypoxia, retained secretions, respiratory failure and death. Effective analgesia improves these outcomes. There is widespread variation in analgesic treatments given to patients including oral, intravenous and epidural routes of administration. Erector spinae plane (ESP) blockade, a novel regional analgesic technique, may be effective, but high quality evidence is lacking.

### Methods & analysis

To determine if a definitive trial of ESP blockade in rib fractures is possible, we are conducting a multicentre, randomised controlled pilot study with feasibility and qualitative assessment. Fifty adult patients with rib fractures will be randomised in a 1:1 ratio to ESP blockade with multimodal analgesia or placebo ESP blockade with multimodal analgesia. Participants and outcome assessors will be blinded. The primary feasibility outcomes are recruitment rate, retention rate and trial acceptability assessed by interview.

### Ethics & dissemination

The study was approved by the Oxford B Research Ethics Committee on 22 February 2022 (REC reference 22/SC/0005). All participants will provide written consent. Trial results will be reported via peer-review and to grant funders.

### Registration details

ISRCTN: 49307616. Protocol version 1.2 dated 07/02/22.

## KEYWORDS

Rib fractures, chest trauma, regional anaesthesia, analgesia, erector spinae plane block.

## STRENGTHS AND LIMITATIONS

- There is widespread variation in the care of patients following rib fractures. The clinical effectiveness of ESP blocks in this patient group is unclear.
- This is a feasibility study with piloting of candidate clinical outcome measures to determine if a definitive trial is feasible; the present work alone cannot answer whether ESP blocks are an effective analgesic modality for patients with rib fractures.
- A feasibility design is a cost-effective and scientifically rigorous method to inform further clinical trial research on a topic, de-risking later work.
- The study will test if an analgesic placebo arm is an acceptable methodological feature for participants, clinicians and investigators.
- The study used a double-blind design and the effectiveness of blinding will be determined by patient and staff interviews.

## INTRODUCTION

The pain from rib fractures is often described by patients as the worst pain they have ever experienced. The major complication of this pain is that patients are unable to cough and breathe deeply, causing atelectasis, retained secretions, hypoxaemia, pneumonia and progressive respiratory failure. Deterioration may require mechanical ventilation on an intensive care unit and lead to death.[1,2] This morbidity and mortality is a direct result of severe pain and impaired gas exchange from underlying contused lung parenchyma and altered ventilatory mechanics from the bone injury.[3] The presence of rib fractures in trauma is associated with a significantly increased risk of death, regardless of other injuries, with an odds ratio of 1.4 (95% CI 1.3–1.6) for adults 18-45 years old and 2.5 (95% CI 2.3–2.8) for adults older than 64 years.[4] This injury is therefore particularly devastating for older adults who not only have a higher risk of death but are also likely to sustain rib fractures from less traumatic accidents (due to bone fragility), for example falling from standing height.[5]

A key objective in the multidisciplinary care of people with rib fractures is the assessment and treatment of pain to provide patient comfort and allow normal respiration and cough to minimise the risk of respiratory failure.[3,6] Alongside specialist physiotherapy and daily multidisciplinary review, good pain management is a vital element of early rib fracture care. Despite this, there is no agreement about the optimal pain relief to give patients. The literature on the use of the different analgesic techniques in rib fractures is inconclusive. Although national and international guidance recommends a multimodal approach in preference to opioid medications alone,[7] two meta-analyses concluded that the evidence to recommend any specific treatment modality is insufficient, and that there is no firm evidence for benefit or harm of one analgesic technique over another.[8,9] This leaves clinicians unsure of which analgesic techniques to use. National UK guidance specifies protocolised analgesic regimes as a standard of care for every patient with multiple rib fractures.[10] However the paucity of evidence meant that this guidance could not recommend which analgesic modality (epidural, peripheral nerve blocks or opioid) should be used in which clinical circumstances. Most patients with rib fractures are given a combination of analgesic drugs like paracetamol, non-steroidal anti-inflammatories, opioids and ketamine to help them cope with severe pain; these are the cornerstones of multimodal analgesia in this setting. Medication side effects (including nausea, pruritus, hallucinations, constipation, renal failure and respiratory depression) significantly limit their use. Some patients receive thoracic epidural analgesia (TEA) and some receive other forms of regional

1  
2 anaesthesia nerve blocks, but the delivery of these interventions by pain-specialist anaesthetists is  
3 driven more by local expertise and experience than by high quality evidence.[11]  
4  
5  
6  
7

8 Regional anaesthesia (including nerve blocks) are clinically useful following rib fractures due to their  
9 opioid sparing effect (therefore reducing serious drug related side-effects) and the superior dynamic  
10 pain relief they provide. Traditional techniques to block the thoracic nerve supply to the ribs include  
11 thoracic epidural analgesia (TEA), paravertebral blockade and intercostal blockade. Systematic review  
12 and meta-analysis of these techniques suggested that TEA provides good pain relief, however this  
13 benefit does not translate into superior outcomes such as occurrence of pulmonary complications and  
14 length of time spent in hospital, intensive care or requiring mechanical ventilation.[12] Unfortunately,  
15 TEA has a significant failure rate and is also associated with common and potentially catastrophic  
16 complications [13] leading to permanent paralysis, and is therefore contraindicated in approximately  
17 one fifth of people with significant injuries. TEA is a complex intervention to perform, practiced by a  
18 small and reducing number of anaesthetists nationally and is not available equitably to patients. Even  
19 within a single hospital the care delivered varies depending on the time of day and availability of staff  
20 to perform such a complex analgesic technique. Only an estimated 9.9-18.4% of patients receive TEA  
21 for rib fracture pain.[14]  
22  
23  
24  
25  
26  
27  
28  
29  
30  
31  
32  
33  
34  
35

36 The erector spinae plane (ESP) block is a regional anaesthetic technique involving the infiltration and  
37 infusion of local anaesthetic along fascial planes containing dorsal and ventral rami of thoracic spinal  
38 nerves supplying the chest wall.[15] The injection is performed away from the spinal cord (thereby  
39 avoiding the complications of TEA). ESP blocks were first described in 2016 [16] and have  
40 demonstrated analgesic efficacy for patients on enhanced recovery after surgery protocols (ERAS)  
41 following spinal,[17] breast,[18] thoracic [19] and cardiac surgery.[20] In these post-operative acute  
42 pain settings, ESP blocks have been shown to reduce patient-reported pain scores and opioid  
43 consumption significantly in the early post-operative period compared to multimodal analgesia  
44 regimes alone. However, the role of ESP blocks in the management of acute rib fracture pain is  
45 currently uncertain.[21] There are no experimental pragmatic multi- centre trials published in this  
46 setting, however single-centre cohort data demonstrates ESP blocks provide effective pain relief and  
47 improve respiratory function when added to multimodal analgesia in patients with rib fractures.[15,22]  
48 Higher quality clinical evidence is urgently needed to guide clinicians on whether the ESP block is a  
49 suitable addition to current multimodal analgesia in patients with rib fractures. A definitive trial on this  
50  
51  
52  
53  
54  
55  
56  
57  
58  
59  
60

1  
2 topic would promote evidence-based practice in rib fracture management and reduce unnecessary  
3 variation in clinical practice across UK trauma centres. However there is currently not enough evidence  
4 on the effectiveness and acceptability of ESP blocks for rib fractures to undertake a definitive  
5 randomised controlled trial (RCT).  
6  
7  
8  
9

10  
11 The aim of this study is therefore to determine if it is feasible to undertake a definitive RCT to establish  
12 if ESP blocks are a clinically effective early treatment for acute pain in patients hospitalised with rib  
13 fractures. Formal hypothesis testing for effectiveness or efficacy is not undertaken in feasibility studies.  
14 The aim of this trial is not to assess effectiveness or efficacy but to determine feasibility of progression  
15 to a definitive RCT.  
16  
17  
18  
19  
20  
21  
22  
23  
24  
25  
26  
27  
28  
29  
30  
31  
32  
33  
34  
35  
36  
37  
38  
39  
40  
41  
42  
43  
44  
45  
46  
47  
48  
49  
50  
51  
52  
53  
54  
55  
56  
57  
58  
59  
60



## METHODS AND ANALYSIS

### Objectives

This study has the primary objective of determining whether it is feasible to undertake a definitive RCT to establish if ESP blocks are a clinically effective early treatment for acute pain in patients hospitalised with rib fractures. Our primary objectives are to determine:

- Trial recruitment rate.
- Trial retention rate.
- Barriers and facilitators to recruitment and retention among participants and recruitment site staff (anaesthetists, allied health professionals, surgeons and research staff) with regard to the acceptability of the trial intervention.

Secondary trial objectives are:

- To determine the willingness of anaesthetists to randomise patients to intervention or control and willingness of potential participants to randomisation.
- To identify causes of protocol violation and trial withdrawal.
- To assess the completeness of data arising from the trial.
- To assess the fidelity of the trial intervention in terms of ESP catheter dislodgement, blockage or other technical failure.
- To assess the acceptability of the intervention to participants.
- To describe complications of the intervention.
- To pilot the collection of candidate outcome measures for a future definitive trial.
- To determine preliminary indicators of effectiveness as measured by candidate clinical outcome measures.

### Patient and Public involvement

The study question builds on previous qualitative work undertaken to validate a patient-derived recovery scale. The scale was developed following interviews with 50 patients and health professionals, with subsequent validation in a 250-patient study. This work characterised the

1  
2  
3  
4  
5  
6  
7  
8  
9  
10  
11  
12  
13  
14  
15  
16  
17  
18  
19  
20  
21  
22  
23  
24  
25  
26  
27  
28  
29  
30  
31  
32  
33  
34  
35  
36  
37  
38  
39  
40  
41  
42  
43  
44  
45  
46  
47  
48  
49  
50  
51  
52  
53  
54  
55  
56  
57  
58  
59  
60

experience of pain and breathing difficulties following rib fracture; identifying management of pain as a research priority for this patient population. The outcome scale developed through this study will be used as an outcome measure in this trial, to help capture patient-centered outcomes. Specifically for this study we have facilitated virtual focus groups with patients who have previously sustained rib fractures and were admitted to Nottingham University Hospitals NHS Trust. The groups discussed the following aspects: the question and study design; recruitment and consent; follow-up data collection; acceptability of blinding and preferred outcome measures. There was strong support for this study; with individuals acknowledging that pain management of non-operatively managed injuries was an important but often overlooked area of their care. A new regional anaesthetic technique was perceived to be valuable as a treatment option or adjunct since participants said they would be keen to avoid the side-effects associated with oral and intravenous analgesia. The ESP block was perceived by focus group members as less invasive than an epidural. The inclusion of a sham intervention was discussed and deemed acceptable given the integrity of the research. The proposed outcome measures were reviewed by participants and were felt to be comprehensive. They valued the addition of embedded qualitative work within the study to allow for holistic feedback about study acceptability for patients and staff.

### Population and setting

The trial will recruit participants at three NHS Major Trauma Centres (MTC):

- Queen's Medical Centre, Nottingham University Hospitals NHS Trust
- John Radcliffe Hospital, Oxford University Hospitals NHS Foundation Trust
- Royal London Hospital, Barts Health NHS Trust

The target population is patients newly admitted to the MTC with one or more new rib fractures who can receive the trial intervention within 12 hours of admission to hospital. Participants will be recruited via their usual clinical care teams (emergency department, major trauma and/or acute pain services), who will notify study investigators of a potentially eligible participant for screening and recruitment purposes.

### *Inclusion criteria:*

- Age  $\geq$  18
- New admission to major trauma centre and can receive trial intervention within 12 hours of admission
- Mechanism of injury blunt thoracic trauma
- Radiographic evidence of 1 or more new traumatic rib fractures
- Moderate or severe unilateral acute pain (defined as 11-point numerical rating scale (NRS) pain  $>4$  when patient performing vital capacity breath or effective cough) at time of enrolment. Patients may have bilateral fractures, but pain must be unilateral.

#### *Exclusion Criteria:*

- Patient refusal or inability to give informed written consent for any reason
- Thoracic injury requiring emergent operative or interventional radiology management
- Allergy to local anaesthetic
- Infection at site of ESP block
- Actual or estimated total body weight  $\leq$  50 kg thereby precluding safe dosing of local anaesthetic for ESP block
- Current or recent involvement in other clinical research

#### **Interventions and blinding**

Following written consent, participant randomisation will be performed to a 1:1 ratio using a web-based automated computer-generated minimisation algorithm with treatment groups balanced for: age, gender, polytrauma and unilateral or bilateral rib fractures. Other than the allocated intervention, both groups will be followed-up in the same way to exclude bias beyond procedures necessary for the allocation treatment. Randomisation will be to two groups:

1. ESP block plus multimodal analgesia (intervention)
2. Sham ESP block plus multimodal analgesia (control)

#### *ESP block plus multimodal analgesia*

Participants randomised to ESP block plus multimodal analgesia (intervention) will receive an US-guided ESP block story the vertebral transverse process corresponding to the mid-point of the consecutively fractured ribs on the side of pain. An initial fascial plane injection of 30ml of 0.25% levo-

1  
2 bupivacaine will be placed, followed by catheter programmed-intermittent boluses of 15ml 0.125%  
3  
4 levo-bupivacaine given 3 hourly with option patient or clinician top-up of 5ml up to every 1 hour.  
5  
6 Participants allocated to intervention will additionally receive standard supportive care and  
7  
8 multimodal analgesia according to British Orthopaedic Association 2016 guidelines. The site-specific  
9  
10 adoption of multimodal analgesia regimes will be reviewed as part of the site feasibility.  
11  
12

### 13 *Sham ESP block plus multimodal analgesia*

14  
15 Participants randomised to Sham ESP block plus multimodal analgesia (control) will receive a  
16  
17 sham/placebo ultrasound-guided ESP block targeting the vertebral transverse process corresponding  
18  
19 to the mid-point of the consecutively fractured ribs on the side of pain. A single 1ml subcutaneous  
20  
21 injection of saline 0.9% will be made and a perineural catheter applied and affixed by skin-glue  
22  
23 externally on the skin which will be dressed and connected to an infusion pump with patient-button  
24  
25 which will remain turned off. Participants allocated to control will additionally receive standard  
26  
27 supportive care and multimodal analgesia according to individual trial site protocol as per the  
28  
29 intervention arm.  
30  
31

32 Participants in both arms will continue to receive multimodal analgesia as dictated by their usual  
33  
34 clinical care team. Following ESPEAR enrolment, additional regional anaesthetic techniques (for  
35  
36 example thoracic epidural insertion) will be undertaken at the discretion of the treating clinician, will  
37  
38 be recorded in the trial CRF and will not lead to participant withdrawal.  
39  
40

### 41 *Blinding*

42  
43 Participants will be blinded to group allocation. Placebo effects are known to play a significant role on  
44  
45 pain perception and patient expectation of analgesic efficacy; therefore it is important that a definitive  
46  
47 trial include a placebo arm. This pilot RCT will test this blinding effectiveness as part of the feasibility  
48  
49 embedded qualitative process analysis. Anaesthetists siting the ESP block or Sham ESP block will not  
50  
51 be blind to group allocation, since this is not technically possible. Outcome assessors will be blind to  
52  
53 group allocation.  
54  
55

### 56 **Outcome measures**

#### 59 *Primary Feasibility Outcomes:*

60 The primary feasibility outcomes, which will be measured to meet the objectives of this trial are:

- Recruitment rate. Defined as the number of eligible participants who consent to participate in the trial as a percentage of all eligible participants. This will be presented per centre per month and measured over the recruitment period (from randomisation of the first participant to randomisation of the final participant). The target recruitment rate is defined as recruitment of 50 participants from three recruiting centres, with each centre being open to recruitment for 12 months. This produces a mean trial target recruitment rate of 1.4 participants per centre per month.
- Retention rate. Defined as the proportion of randomised participants who complete 6-week follow-up with valid candidate clinical outcomes data (see below).
- Barriers and facilitators to recruitment and retention among participants and recruitment site staff (anaesthetists, allied health professionals, surgeons and research staff). This will be assessed in the embedded qualitative study.

### *Secondary Feasibility Outcomes*

The secondary feasibility outcomes are as follows:

- Trial eligibility rate. Defined as the proportion of those patients screened who were eligible for enrolment in the trial.
- Trial consent rate. Defined as the proportion of eligible patients who provided written consent for inclusion in the trial.
- Willingness of anaesthetists to randomise patients to intervention or control and willingness of potential participants to randomisation. This will be achieved through qualitative evaluation, including scrutiny of screening logs, completion of an open-ended survey with healthcare staff and qualitative interviews with research staff conducted by the central research team.
- Causes of protocol violation. Causes will be identified from the Investigator Site File.

### *Secondary Clinical Outcomes*

The following clinical outcomes are considered secondary outcomes of the trial, and will be measured to assess the relevance, completeness, and acceptability of these outcomes for use in a future definitive RCT:

- 1  
2  
3  
4  
5  
6  
7  
8  
9  
10  
11  
12  
13  
14  
15  
16  
17  
18  
19  
20  
21  
22  
23  
24  
25  
26  
27  
28  
29  
30  
31  
32  
33  
34  
35  
36  
37  
38  
39  
40  
41  
42  
43  
44  
45  
46  
47  
48  
49  
50  
51  
52  
53  
54  
55  
56  
57  
58  
59  
60
- Static chest wall pain intensity. Measured on Short Form McGill Pain Questionnaire 2 (SF-MPQ-2) to describe the worst pain experienced by the patient between the following eight time points: 24 hours prior to receipt of the trial intervention (defined as trial baseline), then at 24, 48 and 72 hours. Scores will be described at each time interval in comparison to baseline and summed to provide a cumulative static chest wall pain score. The time at which each measure is taken will also be recorded.
  - Functional (i.e. dynamic) chest wall pain intensity. Measured on a modified Functional Pain Scale (m-FPS) as the worst pain experienced by the patient during the following eight time points: 24 hours prior to receipt of the trial intervention (defined as trial baseline), then at 24, 48 and 72 hours. The time at which each measure is taken will also be recorded. Scores will be described at each time interval in comparison to baseline and summed to provide a cumulative functional chest wall pain score. The m-FPS consists of the following Likert-scaled responses: 0 = no pain; 1 = tolerable pain but able to perform vital capacity breath and effective cough; 2 = tolerable pain but prevents either vital capacity breath or effective cough; 3 = intolerable pain but can perform either vital capacity breath or effective cough; 4 = intolerable pain and unable to perform vital capacity breath or effective cough; 5 = intolerable and unable to verbally communicate due to pain.
  - Forced vital capacity, forced expiratory volume in one second and peak cough flow (Spirometry). Measured by bed-side portable spirometry. Measured immediately prior to receipt of trial intervention (defined as trial baseline), then at the following time points following receipt of intervention: 3 hours, 6 hours, 9 hours, 12 hours, 24 hours, 48 hours and 72 hours.
  - Cumulative non-opioid analgesic consumption. The administration of the non-opioid analgesics paracetamol and non-steroidal anti-inflammatories will be measured as total doses administered in the 24 hours prior to receipt of the trial intervention (defined as trial baseline), then at the following time points following receipt of the intervention: 24 hours, 48 hours and 72 hours.
  - Cumulative opioid analgesic consumption. The administration of the opioid analgesics will be measured as total dose administered in the 24 hours prior to receipt of the trial intervention (defined as trial baseline), then at the following time points following receipt of the intervention: 24 hours, 48 hours and 72 hours. All doses will be converted to morphine-equivalents for analysis.

- 1  
2  
3 • Cumulative ketamine analgesic consumption. The administration of the ketamine will be  
4 measured as total dose administered in the 24 hours prior to receipt of the trial intervention  
5 (defined as trial baseline), then at the following time points following receipt of the  
6 intervention: 24 hours, 48 hours and 72 hours.  
7
- 8  
9  
10 • Additional procedures of regional anaesthesia following ESP block. The administration of the  
11 following additional procedures of regional anaesthesia will be recorded in the 24 hours prior  
12 to receipt of the trial intervention (defined as trial baseline), then at the following time points  
13 following receipt of the intervention: 24 hours, 48 hours and 72 hours: intercostal, pleural,  
14 serratus plane, non-trial erector-spinae, paravertebral and epidural blockade.  
15
- 16  
17 • Opioid-related side-effects. The following opioid-related side-effects will be assessed  
18 immediately prior to receipt of trial intervention (defined as trial baseline) then at the following  
19 time points following receipt of intervention, 24 hours, 48 hours and 72 hours:  
20  
21
  - 22 ○ Constipation, defined as absence of bowel movement in the preceding 24 hour period.
  - 23 ○ Nausea or vomiting, scored on a 5-point scale (0 = no nausea or vomiting; 1 = mild  
24 nausea, no treatment required; 2 = nausea, anti-emetic administered; 3 = vomiting,  
25 anti-emetics administered; 4 = nausea or vomiting unresponsive to anti-emetic  
26 therapy).
  - 27 ○ Pruritis, scored on 11-point numerical rating scale.
  - 28 ○ Opioid-induced sedation, scored on Modified Observer's Assessment of  
29 Alertness/Sedation scale.
  - 30
  - 31
  - 32
  - 33
  - 34
  - 35
  - 36
  - 37
  - 38
- 39 • Oxygen requirement. Measured as maximum flow rate of supplemental oxygen administered  
40 to participant immediately prior to receipt of trial intervention (defined as trial baseline), then  
41 at the following time points following receipt of intervention, 3, 6, 9, 12, 24 hours, 48 hours and  
42 72 hours.  
43
- 44 • Complications of regional anaesthesia. The following complications of regional anaesthesia will  
45 be assessed at 24 hours, 48 hours and 72 hours following receipt of intervention:  
46  
47
  - 48 ○ Treatment for local anaesthetic toxicity, defined as administration of intra-lipid therapy  
49 in the preceding 24 hour period.
  - 50 ○ Bleeding or infection at intervention insertion site.
  - 51 ○ Catheter dislodgement requiring re-sited intervention in preceding 24 hour period.
  - 52
  - 53
  - 54
  - 55
  - 56
  - 57
- 58 • Condition-specific outcome measure. Measured on Outcomes after Chest Trauma Score (OCTS)  
59 to describe severity of rib-related symptoms (domains include mobility, breathing, activities,  
60

personal care, wellbeing and pain). The OCTS will be administered twice prior to receipt of trial intervention (defined as trial baseline) then at the following time points following receipt of intervention: 72 hours and 6 weeks.

- Diagnosis of pneumonia. Defined as administration of antibiotics for community- or hospital-acquired pneumonia assessed in the 24 hours prior to receipt of trial intervention (defined as trial baseline) then at the following time points following receipt of intervention, 24 hours, 48 hours and 72 hours and 6 weeks.
- Escalation of care to critical care. Defined as admission to Level 2 (HDU) or Level 3 (ICU) bed assessed in the 24 hours prior to receipt of trial intervention (defined as trial baseline) then at the following time points following receipt of intervention, 24 hours, 48 hours and 72 hours and 6 weeks.
- Length of hospital stay. Assessed 6 weeks following receipt of intervention.
- Quality of life measured on EQ-5D-5L. Assessed in the 24 hours prior to receipt of trial intervention (defined as trial baseline), then at 72 hours and 6 weeks following receipt of intervention.
- All-cause mortality. Assessed 6 weeks following receipt of intervention.

### Sample size calculation

Formal sample size calculation is not appropriate for feasibility studies. Currently there is no single agreed method for sample size for a feasibility trial, but most authors propose a sample size between 24 and 60 depending on the study aims.[23,24] To answer our key objectives, we aim to recruit 50 participants, allowing estimation of recruitment and retention rates with a margin of error of less than 10%.

### Statistical analysis

Data will be collected via REDCap database. Data analysis will primarily be descriptive to address the feasibility objectives of the trial. All analyses will be documented in a Statistical Analysis Plan which will be finalised prior to database lock. Feasibility outcomes will be estimated using descriptive statistics (with 95% confidence intervals [CI]) and will include screening rates, recruitment rates, follow-up rates, protocol adherence and amount of missing data for clinical outcomes. Key baseline characteristics



1  
2 (age, sex) will be compared between trial participants and the ineligible and non-consenting patients,  
3  
4 to ascertain adequacy of inclusion/exclusion criteria and likely generalisability of the trial to the  
5  
6 required targeted population. Similarly, we will compare the key patient characteristics between those  
7  
8 followed-up and those lost to follow-up and investigate how similar this is across the treatment arms  
9  
10 to assess possible attrition bias in data collection. A baseline table will compare important  
11  
12 demographic and clinical characteristics between the two treatment arms. It is not a primary objective  
13  
14 of the feasibility trial to obtain definitive estimates of intervention effect on clinical outcomes and so  
15  
16 the clinical outcomes will be analysed descriptively. Additionally, we will use appropriate regression  
17  
18 method to estimate the likely range of intervention effects (point estimate and CIs) for key clinical  
19  
20 outcomes adjusted for minimisation variables. Reporting of the study will be according to the  
21  
22 CONSORT Statement: 2016 extension to randomised pilot and feasibility trials.[25]  
23  
24  
25  
26  
27  
28  
29  
30  
31  
32  
33  
34  
35  
36  
37  
38  
39  
40  
41  
42  
43  
44  
45  
46  
47  
48  
49  
50  
51  
52  
53  
54  
55  
56  
57  
58  
59  
60

## ETHICS AND DISSEMINATION

The study was granted approval by the Oxford B Research Ethics Committee on 22 February 2022 (REC reference 22/SC/0005). Substantial amendments that require review by REC will not be implemented until the REC grants a favourable opinion for the trial. All personal identifiable information collected during the trial will be coded, depersonalised with unique codes for each patient. The trial will be compliant with the requirements of the General Data Protection Regulation 2018 and the Data Protection Act 2018. The chief investigator and principal investigators at participating sites will have access to the full dataset. Relevant anonymized patient level data will be made available on reasonable request. Day-to-day trial management will be provided by the Trial Management Group, who will meet at least once per month. Independent oversight of trial conduct will be provided by a Trial Steering Committee, attended by the trial Chief-investigators and methodologist, with three independent members with expertise in trial methodology and statistics, anaesthesia and trauma care.

A manuscript for a high-impact peer-reviewed journal will be prepared. Authorship will be determined in accordance with ICMJE guidelines,[26] and other contributors will be acknowledged. The results of this project will be disseminated to patients through local mechanisms at all participating centres.

**REFERENCES**

1. Ahn Y, Görlinger K, Alam HB, et al. Pain-associated respiratory failure in chest trauma. *Anesthesiol* 2013;118:701–8.
2. Sirmali M, Türüt H, Topçu S, et al. A comprehensive analysis of traumatic rib fractures: morbidity, mortality and management. *Journal of Cardio-Thoracic Surgery* 2003;24:133-138.
3. May L, Macadmed M, Hillermann C, et al. Rib fracture management. *Br J Anaesth Educ* 2016;16:26–32.
4. Kent R, Woods W, Bostrom O. Fatality risk and the presence of rib fractures. *Ann Adv Automot Med* 2008;52:73-82.
5. Holcomb JB, McMullin NR, Kozar RA, et al. Morbidity from rib fractures increases after age 45. *J Am Coll Surg* 2003;196:549–55.
6. London Major Trauma System: management of elderly major trauma patients. 2021. Available at: <https://www.c4ts.qmul.ac.uk/downloads/2021-pan-london-major-trauma-system-management-of-older-trauma.-third-editionapril-2021.pdf>. Accessed 04 March 2022.
7. Galvagno SM, Smith CE, Varon AJ, et al. Pain management for blunt thoracic trauma: a joint practice management guideline from the eastern association for the surgery of trauma and trauma anesthesiology society. *J Trauma Acute Care Surg* 2016;81:936-951.
8. Carrier FM, Turgeon AF, Nicole PC, et al. Effect of epidural analgesia in patients with traumatic rib fractures: a systematic review and meta-analysis of randomized controlled trials. *Can J Anesth* 2009;56:230–42.
9. Duch P, Møller MH. Epidural analgesia in patients with traumatic rib fractures: a systematic review of randomised controlled trials. *Acta Anaesthesiol Scand* 2015;59:698–709.
10. British Orthopaedic Association Standards for Trauma and Orthopaedics (BOASTS). Available at: <https://www.boa.ac.uk/standards-guidance/boasts.html>. Accessed 04 March 2022.
11. El-Boghdadly K, Wiles MD. Regional anaesthesia for rib fractures: too many choices, too little evidence. *Anaesthesia* 2019;74:564–8.
12. Peek J, Smeeing DPJ, Hietbrink F, et al. Comparison of analgesic interventions for traumatic rib fractures: a systematic review and meta-analysis. *Eur J Trauma Emerg Surg* 2019;45:597-622.

- 1  
2  
3 13. Hewson DW, Bedforth NM, Hardman JG. Spinal cord injury arising in anaesthesia practice.  
4  
5 Anaesthesia. 2018;73:43–50.
- 6  
7 14. Beard I, Hillermann C, Beard E, et al. Multicenter longitudinal cross-sectional study comparing  
8  
9 effectiveness of serratus anterior plane, paravertebral and thoracic epidural for the analgesia of  
10  
11 multiple rib fractures. *Reg Anesth Pain Med* 2020;45:351–6.
- 12  
13 15. Adhikary SD, Liu WM, Fuller E, et al. The effect of erector spinae plane block on respiratory and  
14  
15 analgesic outcomes in multiple rib fractures: a retrospective cohort study. *Anaesthesia* 2019;74:585–  
16  
17 93.
- 18  
19 16. Forero M, Adhikary SD, Lopez H, et al. The erector spinae plane block. *Reg Anesth Pain Med*  
20  
21 2016;41:621–7.
- 22  
23 17. Singh S, Choudhary NK, Lalin D, et al. Bilateral ultrasound-guided erector spinae plane block for  
24  
25 postoperative analgesia in lumbar spine surgery: a randomized control trial. *J Neurosurg Anesthesiol*  
26  
27 2020;32:330–4.
- 28  
29 18. Gürkan Y, Aksu C, Kuş A, et al. Ultrasound guided erector spinae plane block reduces postoperative  
30  
31 opioid consumption following breast surgery: a randomized controlled study. *J Clin Anesth*  
32  
33 2018;50:65–8.
- 34  
35 19. Ciftci B, Ekin M, Celik EC, et al. Efficacy of an ultrasound-guided erector spinae plane block for  
36  
37 postoperative analgesia management after video-assisted thoracic surgery: a prospective randomized  
38  
39 study. *J Cardiothorac Vasc Anesth* 2020;34:444–9.
- 40  
41 20. Macaire P, Ho N, Nguyen V, et al. Bilateral ultrasound-guided thoracic erector spinae plane blocks  
42  
43 using a programmed intermittent bolus improve opioid-sparing postoperative analgesia in pediatric  
44  
45 patients after open cardiac surgery: a randomized, double-blind, placebo-controlled trial. *Reg Anesth*  
46  
47 *Pain Med* 2020;45:805–12.
- 48  
49 21. El-Boghdady K, Pawa A. The erector spinae plane block: plane and simple. *Anaesthesia*  
50  
51 2017;72:434–8.
- 52  
53 22. Hamilton D, Manickam B. Erector spinae plane block for pain relief in rib fractures. *Br J Anaesth*  
54  
55 2017;118:474–5.
- 56  
57 23. Julious SA. Sample size of 12 per group rule of thumb for a pilot study. *Pharm Stat* 2005;4:287–91.
- 58  
59 24. Teare MD, dimairo M, shephard N, et al. Sample size requirements to estimate key design  
60  
parameters from external pilot randomised controlled trials: a simulation study. *Trials* 2014;15:1–13.

1  
2 25. Eldridge SM, Chan CL, Campbell MJ, et al. Consort 2010 statement: extension to randomised pilot  
3 and feasibility trials. *Pilot Feasibility Stud* 2016;Article Number 64.

4  
5  
6 <https://pilotfeasibilitystudies.biomedcentral.com/articles/10.1186/s40814-016-0105-8>. Accessed 04  
7  
8 March 2022.

9  
10 26. Recommendations for the conduct, reporting, editing and publication of scholarly work in medical  
11 journals. International Committee of Medical Journal Editors (ICMJE). Available at:

12  
13 <http://www.icmje.org>. Accessed 04 March 2022.  
14  
15  
16  
17  
18  
19  
20  
21  
22  
23  
24  
25  
26  
27  
28  
29  
30  
31  
32  
33  
34  
35  
36  
37  
38  
39  
40  
41  
42  
43  
44  
45  
46  
47  
48  
49  
50  
51  
52  
53  
54  
55  
56  
57  
58  
59  
60

For peer review only

## **AUTHOR'S CONTRIBUTIONS**

Conception of study: DWH, BO, NMB

Study design: DWH, JN, RO, BO, MLC, NMB

Ongoing trial management: All authors

Writing and final approval of protocol: All authors

## **FUNDING STATEMENT**

This work was funded by the National Institute for Health Research (NIHR) (Research for Patient Benefit programme Call 42, [project reference: NIHR202195]). The views expressed are those of the authors and not necessarily those of the NIHR or the UK Department of Health and Social Care.

## **COMPETING INTERESTS**

MLC is an NIHR Senior Investigator. The remaining authors declare no competing interests.

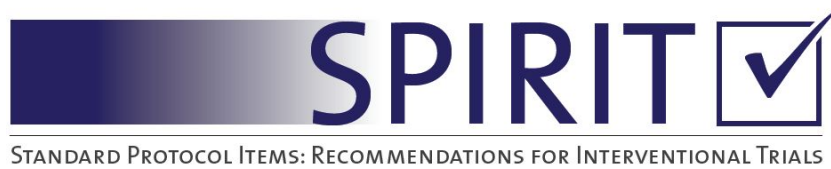

Erector Spinae Plane blocks for the Early Analgesia of Rib fractures in trauma (ESPEAR): protocol for a multicentre pilot randomised controlled trial with feasibility and embedded qualitative assessment

| Section/item                      | Item No | Description                                                                                                                                                                                                                                                                              | ESPEAR PROTOCOL PAGE |
|-----------------------------------|---------|------------------------------------------------------------------------------------------------------------------------------------------------------------------------------------------------------------------------------------------------------------------------------------------|----------------------|
| <b>Administrative information</b> |         |                                                                                                                                                                                                                                                                                          |                      |
| Title                             | 1       | Descriptive title identifying the study design, population, interventions, and, if applicable, trial acronym                                                                                                                                                                             | 1                    |
| Trial registration                | 2a      | Trial identifier and registry name. If not yet registered, name of intended registry                                                                                                                                                                                                     | 1                    |
|                                   | 2b      | All items from the World Health Organization Trial Registration Data Set                                                                                                                                                                                                                 | 1                    |
| Protocol version                  | 3       | Date and version identifier                                                                                                                                                                                                                                                              | 1                    |
| Funding                           | 4       | Sources and types of financial, material, and other support                                                                                                                                                                                                                              | 20                   |
| Roles and responsibilities        | 5a      | Names, affiliations, and roles of protocol contributors                                                                                                                                                                                                                                  | 1                    |
|                                   | 5b      | Name and contact information for the trial sponsor                                                                                                                                                                                                                                       | 16                   |
|                                   | 5c      | Role of study sponsor and funders, if any, in study design; collection, management, analysis, and interpretation of data; writing of the report; and the decision to submit the report for publication, including whether they will have ultimate authority over any of these activities | 20                   |

|    |                                                           |     |                                                             |
|----|-----------------------------------------------------------|-----|-------------------------------------------------------------|
| 1  |                                                           |     |                                                             |
| 2  |                                                           | 5d  | Composition, roles, and responsibilities of the 16          |
| 3  |                                                           |     | coordinating centre, steering committee, endpoint           |
| 4  |                                                           |     | adjudication committee, data management team,               |
| 5  |                                                           |     | and other individuals or groups overseeing the              |
| 6  |                                                           |     | trial, if applicable (see Item 21a for data monitoring      |
| 7  |                                                           |     | committee)                                                  |
| 8  |                                                           |     |                                                             |
| 9  |                                                           |     |                                                             |
| 10 | <b>Introduction</b>                                       |     |                                                             |
| 11 |                                                           |     |                                                             |
| 12 | Background and                                            | 6a  | Description of research question and justification 4-6      |
| 13 | rationale                                                 |     | for undertaking the trial, including summary of             |
| 14 |                                                           |     | relevant studies (published and unpublished)                |
| 15 |                                                           |     | examining benefits and harms for each                       |
| 16 |                                                           |     | intervention                                                |
| 17 |                                                           | 6b  | Explanation for choice of comparators 10                    |
| 18 |                                                           |     |                                                             |
| 19 | Objectives                                                | 7   | Specific objectives or hypotheses 8-9                       |
| 20 |                                                           |     |                                                             |
| 21 | Trial design                                              | 8   | Description of trial design including type of trial (eg, 7  |
| 22 |                                                           |     | parallel group, crossover, factorial, single group),        |
| 23 |                                                           |     | allocation ratio, and framework (eg, superiority,           |
| 24 |                                                           |     | equivalence, noninferiority, exploratory)                   |
| 25 |                                                           |     |                                                             |
| 26 |                                                           |     |                                                             |
| 27 |                                                           |     |                                                             |
| 28 |                                                           |     |                                                             |
| 29 | <b>Methods: Participants, interventions, and outcomes</b> |     |                                                             |
| 30 |                                                           |     |                                                             |
| 31 | Study setting                                             | 9   | Description of study settings (eg, community clinic, 7      |
| 32 |                                                           |     | academic hospital) and list of countries where data         |
| 33 |                                                           |     | will be collected. Reference to where list of study         |
| 34 |                                                           |     | sites can be obtained                                       |
| 35 |                                                           |     |                                                             |
| 36 |                                                           |     |                                                             |
| 37 | Eligibility criteria                                      | 10  | Inclusion and exclusion criteria for participants. If 8     |
| 38 |                                                           |     | applicable, eligibility criteria for study centres and      |
| 39 |                                                           |     | individuals who will perform the interventions (eg,         |
| 40 |                                                           |     | surgeons, psychotherapists)                                 |
| 41 |                                                           |     |                                                             |
| 42 |                                                           |     |                                                             |
| 43 | Interventions                                             | 11a | Interventions for each group with sufficient detail to 9-10 |
| 44 |                                                           |     | allow replication, including how and when they will         |
| 45 |                                                           |     | be administered                                             |
| 46 |                                                           |     |                                                             |
| 47 |                                                           | 11b | Criteria for discontinuing or modifying allocated 10        |
| 48 |                                                           |     | interventions for a given trial participant (eg, drug       |
| 49 |                                                           |     | dose change in response to harms, participant               |
| 50 |                                                           |     | request, or improving/worsening disease)                    |
| 51 |                                                           |     |                                                             |
| 52 |                                                           |     |                                                             |
| 53 |                                                           | 11c | Strategies to improve adherence to intervention 7           |
| 54 |                                                           |     | protocols, and any procedures for monitoring                |
| 55 |                                                           |     | adherence (eg, drug tablet return, laboratory tests)        |
| 56 |                                                           |     |                                                             |
| 57 |                                                           | 11d | Relevant concomitant care and interventions that 9-10       |
| 58 |                                                           |     | are permitted or prohibited during the trial                |
| 59 |                                                           |     |                                                             |
| 60 |                                                           |     |                                                             |



|    |                      |    |                                                                                                                                                                                                                                                                                                                                                                                |              |
|----|----------------------|----|--------------------------------------------------------------------------------------------------------------------------------------------------------------------------------------------------------------------------------------------------------------------------------------------------------------------------------------------------------------------------------|--------------|
| 1  |                      |    |                                                                                                                                                                                                                                                                                                                                                                                |              |
| 2  | Outcomes             | 12 | Primary, secondary, and other outcomes, including the specific measurement variable (eg, systolic blood pressure), analysis metric (eg, change from baseline, final value, time to event), method of aggregation (eg, median, proportion), and time point for each outcome. Explanation of the clinical relevance of chosen efficacy and harm outcomes is strongly recommended | 10-14        |
| 3  |                      |    |                                                                                                                                                                                                                                                                                                                                                                                |              |
| 4  |                      |    |                                                                                                                                                                                                                                                                                                                                                                                |              |
| 5  |                      |    |                                                                                                                                                                                                                                                                                                                                                                                |              |
| 6  |                      |    |                                                                                                                                                                                                                                                                                                                                                                                |              |
| 7  |                      |    |                                                                                                                                                                                                                                                                                                                                                                                |              |
| 8  |                      |    |                                                                                                                                                                                                                                                                                                                                                                                |              |
| 9  |                      |    |                                                                                                                                                                                                                                                                                                                                                                                |              |
| 10 |                      |    |                                                                                                                                                                                                                                                                                                                                                                                |              |
| 11 |                      |    |                                                                                                                                                                                                                                                                                                                                                                                |              |
| 12 | Participant timeline | 13 | Time schedule of enrolment, interventions (including any run-ins and washouts), assessments, and visits for participants. A schematic diagram is highly recommended (see Figure)                                                                                                                                                                                               | 10           |
| 13 |                      |    |                                                                                                                                                                                                                                                                                                                                                                                |              |
| 14 |                      |    |                                                                                                                                                                                                                                                                                                                                                                                |              |
| 15 |                      |    |                                                                                                                                                                                                                                                                                                                                                                                |              |
| 16 |                      |    |                                                                                                                                                                                                                                                                                                                                                                                |              |
| 17 |                      |    |                                                                                                                                                                                                                                                                                                                                                                                |              |
| 18 |                      |    |                                                                                                                                                                                                                                                                                                                                                                                |              |
| 19 | Sample size          | 14 | Estimated number of participants needed to achieve study objectives and how it was determined, including clinical and statistical assumptions supporting any sample size calculations                                                                                                                                                                                          | 14           |
| 20 |                      |    |                                                                                                                                                                                                                                                                                                                                                                                |              |
| 21 |                      |    |                                                                                                                                                                                                                                                                                                                                                                                |              |
| 22 |                      |    |                                                                                                                                                                                                                                                                                                                                                                                |              |
| 23 |                      |    |                                                                                                                                                                                                                                                                                                                                                                                |              |
| 24 |                      |    |                                                                                                                                                                                                                                                                                                                                                                                |              |
| 25 |                      |    |                                                                                                                                                                                                                                                                                                                                                                                |              |
| 26 | Recruitment          | 15 | Strategies for achieving adequate participant enrolment to reach target sample size                                                                                                                                                                                                                                                                                            | Not provided |
| 27 |                      |    |                                                                                                                                                                                                                                                                                                                                                                                |              |
| 28 |                      |    |                                                                                                                                                                                                                                                                                                                                                                                |              |

### Methods: Assignment of interventions (for controlled trials)

#### Allocation:

|    |                                  |     |                                                                                                                                                                                                                                                                                                                                                          |    |
|----|----------------------------------|-----|----------------------------------------------------------------------------------------------------------------------------------------------------------------------------------------------------------------------------------------------------------------------------------------------------------------------------------------------------------|----|
| 31 |                                  |     |                                                                                                                                                                                                                                                                                                                                                          |    |
| 32 |                                  |     |                                                                                                                                                                                                                                                                                                                                                          |    |
| 33 | Sequence generation              | 16a | Method of generating the allocation sequence (eg, computer-generated random numbers), and list of any factors for stratification. To reduce predictability of a random sequence, details of any planned restriction (eg, blocking) should be provided in a separate document that is unavailable to those who enrol participants or assign interventions | 9  |
| 34 |                                  |     |                                                                                                                                                                                                                                                                                                                                                          |    |
| 35 |                                  |     |                                                                                                                                                                                                                                                                                                                                                          |    |
| 36 |                                  |     |                                                                                                                                                                                                                                                                                                                                                          |    |
| 37 |                                  |     |                                                                                                                                                                                                                                                                                                                                                          |    |
| 38 |                                  |     |                                                                                                                                                                                                                                                                                                                                                          |    |
| 39 |                                  |     |                                                                                                                                                                                                                                                                                                                                                          |    |
| 40 |                                  |     |                                                                                                                                                                                                                                                                                                                                                          |    |
| 41 |                                  |     |                                                                                                                                                                                                                                                                                                                                                          |    |
| 42 |                                  |     |                                                                                                                                                                                                                                                                                                                                                          |    |
| 43 |                                  |     |                                                                                                                                                                                                                                                                                                                                                          |    |
| 44 | Allocation concealment mechanism | 16b | Mechanism of implementing the allocation sequence (eg, central telephone; sequentially numbered, opaque, sealed envelopes), describing any steps to conceal the sequence until interventions are assigned                                                                                                                                                | 9  |
| 45 |                                  |     |                                                                                                                                                                                                                                                                                                                                                          |    |
| 46 |                                  |     |                                                                                                                                                                                                                                                                                                                                                          |    |
| 47 |                                  |     |                                                                                                                                                                                                                                                                                                                                                          |    |
| 48 |                                  |     |                                                                                                                                                                                                                                                                                                                                                          |    |
| 49 |                                  |     |                                                                                                                                                                                                                                                                                                                                                          |    |
| 50 |                                  |     |                                                                                                                                                                                                                                                                                                                                                          |    |
| 51 | Implementation                   | 16c | Who will generate the allocation sequence, who will enrol participants, and who will assign participants to interventions                                                                                                                                                                                                                                | 9  |
| 52 |                                  |     |                                                                                                                                                                                                                                                                                                                                                          |    |
| 53 |                                  |     |                                                                                                                                                                                                                                                                                                                                                          |    |
| 54 |                                  |     |                                                                                                                                                                                                                                                                                                                                                          |    |
| 55 | Blinding (masking)               | 17a | Who will be blinded after assignment to interventions (eg, trial participants, care providers, outcome assessors, data analysts), and how                                                                                                                                                                                                                | 10 |
| 56 |                                  |     |                                                                                                                                                                                                                                                                                                                                                          |    |
| 57 |                                  |     |                                                                                                                                                                                                                                                                                                                                                          |    |
| 58 |                                  |     |                                                                                                                                                                                                                                                                                                                                                          |    |
| 59 |                                  |     |                                                                                                                                                                                                                                                                                                                                                          |    |
| 60 |                                  |     |                                                                                                                                                                                                                                                                                                                                                          |    |

- 1  
2  
3  
4  
5  
6  
7
- 17b If blinded, circumstances under which unblinding is permissible, and procedure for revealing a participant's allocated intervention during the trial Not provided

8  
9  
10  
11  
12  
13  
14  
15  
16  
17  
18  
19

**Methods: Data collection, management, and analysis**

- 20  
21  
22  
23  
24  
25  
26  
27  
28  
29  
30  
31  
32  
33  
34  
35  
36  
37  
38  
39  
40  
41  
42  
43  
44  
45  
46  
47  
48
- Data collection methods 18a Plans for assessment and collection of outcome, baseline, and other trial data, including any related processes to promote data quality (eg, duplicate measurements, training of assessors) and a description of study instruments (eg, questionnaires, laboratory tests) along with their reliability and validity, if known. Reference to where data collection forms can be found, if not in the protocol 14
- 18b Plans to promote participant retention and complete follow-up, including list of any outcome data to be collected for participants who discontinue or deviate from intervention protocols Not provided
- Data management 19 Plans for data entry, coding, security, and storage, including any related processes to promote data quality (eg, double data entry; range checks for data values). Reference to where details of data management procedures can be found, if not in the protocol Not provided
- Statistical methods 20a Statistical methods for analysing primary and secondary outcomes. Reference to where other details of the statistical analysis plan can be found, if not in the protocol 14-15
- 20b Methods for any additional analyses (eg, subgroup and adjusted analyses) 14-15
- 20c Definition of analysis population relating to protocol non-adherence (eg, as randomised analysis), and any statistical methods to handle missing data (eg, multiple imputation) 14-15

49  
50

**Methods: Monitoring**

- 51  
52  
53  
54  
55  
56  
57  
58  
59  
60
- Data monitoring 21a Composition of data monitoring committee (DMC); summary of its role and reporting structure; statement of whether it is independent from the sponsor and competing interests; and reference to where further details about its charter can be found, if not in the protocol. Alternatively, an explanation of why a DMC is not needed 16

|    |                                 |     |                                                                     |
|----|---------------------------------|-----|---------------------------------------------------------------------|
| 1  |                                 |     |                                                                     |
| 2  |                                 | 21b | Description of any interim analyses and stopping 14+16              |
| 3  |                                 |     | guidelines, including who will have access to these                 |
| 4  |                                 |     | interim results and make the final decision to                      |
| 5  |                                 |     | terminate the trial                                                 |
| 6  |                                 |     |                                                                     |
| 7  | Harms                           | 22  | Plans for collecting, assessing, reporting, and 16                  |
| 8  |                                 |     | managing solicited and spontaneously reported                       |
| 9  |                                 |     | adverse events and other unintended effects of                      |
| 10 |                                 |     | trial interventions or trial conduct                                |
| 11 |                                 |     |                                                                     |
| 12 |                                 |     |                                                                     |
| 13 | Auditing                        | 23  | Frequency and procedures for auditing trial 16                      |
| 14 |                                 |     | conduct, if any, and whether the process will be                    |
| 15 |                                 |     | independent from investigators and the sponsor                      |
| 16 |                                 |     |                                                                     |
| 17 |                                 |     |                                                                     |
| 18 | <b>Ethics and dissemination</b> |     |                                                                     |
| 19 |                                 |     |                                                                     |
| 20 | Research ethics                 | 24  | Plans for seeking research ethics 16                                |
| 21 | approval                        |     | committee/institutional review board (REC/IRB)                      |
| 22 |                                 |     | approval                                                            |
| 23 |                                 |     |                                                                     |
| 24 | Protocol                        | 25  | Plans for communicating important protocol 16                       |
| 25 | amendments                      |     | modifications (eg, changes to eligibility criteria,                 |
| 26 |                                 |     | outcomes, analyses) to relevant parties (eg,                        |
| 27 |                                 |     | investigators, REC/IRBs, trial participants, trial                  |
| 28 |                                 |     | registries, journals, regulators)                                   |
| 29 |                                 |     |                                                                     |
| 30 |                                 |     |                                                                     |
| 31 | Consent or                      | 26a | Who will obtain informed consent or assent from 16                  |
| 32 | assent                          |     | potential trial participants or authorised surrogates,              |
| 33 |                                 |     | and how (see Item 32)                                               |
| 34 |                                 |     |                                                                     |
| 35 |                                 |     |                                                                     |
| 36 |                                 | 26b | Additional consent provisions for collection and N/A                |
| 37 |                                 |     | use of participant data and biological specimens in                 |
| 38 |                                 |     | ancillary studies, if applicable                                    |
| 39 |                                 |     |                                                                     |
| 40 | Confidentiality                 | 27  | How personal information about potential and 16                     |
| 41 |                                 |     | enrolled participants will be collected, shared, and                |
| 42 |                                 |     | maintained in order to protect confidentiality                      |
| 43 |                                 |     | before, during, and after the trial                                 |
| 44 |                                 |     |                                                                     |
| 45 |                                 |     |                                                                     |
| 46 | Declaration of                  | 28  | Financial and other competing interests for 20                      |
| 47 | interests                       |     | principal investigators for the overall trial and each              |
| 48 |                                 |     | study site                                                          |
| 49 |                                 |     |                                                                     |
| 50 | Access to data                  | 29  | Statement of who will have access to the final trial 20             |
| 51 |                                 |     | dataset, and disclosure of contractual agreements                   |
| 52 |                                 |     | that limit such access for investigators                            |
| 53 |                                 |     |                                                                     |
| 54 |                                 |     |                                                                     |
| 55 | Ancillary and                   | 30  | Provisions, if any, for ancillary and post-trial care, Not provided |
| 56 | post-trial care                 |     | and for compensation to those who suffer harm                       |
| 57 |                                 |     | from trial participation                                            |
| 58 |                                 |     |                                                                     |
| 59 |                                 |     |                                                                     |
| 60 |                                 |     |                                                                     |

|    |                   |     |                                                        |
|----|-------------------|-----|--------------------------------------------------------|
| 1  |                   |     |                                                        |
| 2  | Dissemination     | 31a | Plans for investigators and sponsor to                 |
| 3  | policy            |     | communicate trial results to participants,             |
| 4  |                   |     | healthcare professionals, the public, and other        |
| 5  |                   |     | relevant groups (eg, via publication, reporting in     |
| 6  |                   |     | results databases, or other data sharing               |
| 7  |                   |     | arrangements), including any publication               |
| 8  |                   |     | restrictions                                           |
| 9  |                   |     |                                                        |
| 10 |                   |     |                                                        |
| 11 |                   | 31b | Authorship eligibility guidelines and any intended     |
| 12 |                   |     | use of professional writers                            |
| 13 |                   |     |                                                        |
| 14 |                   | 31c | Plans, if any, for granting public access to the full  |
| 15 |                   |     | protocol, participant-level dataset, and statistical   |
| 16 |                   |     | code                                                   |
| 17 |                   |     |                                                        |
| 18 |                   |     |                                                        |
| 19 | <b>Appendices</b> |     |                                                        |
| 20 |                   |     |                                                        |
| 21 | Informed consent  | 32  | Model consent form and other related                   |
| 22 | materials         |     | documentation given to participants and authorised     |
| 23 |                   |     | surrogates                                             |
| 24 |                   |     |                                                        |
| 25 |                   |     |                                                        |
| 26 | Biological        | 33  | Plans for collection, laboratory evaluation, and       |
| 27 | specimens         |     | storage of biological specimens for genetic or         |
| 28 |                   |     | molecular analysis in the current trial and for future |
| 29 |                   |     | use in ancillary studies, if applicable                |
| 30 |                   |     |                                                        |

31

32 \*It is strongly recommended that this checklist be read in conjunction with the SPIRIT 2013

33 Explanation & Elaboration for important clarification on the items. Amendments to the

34 protocol should be tracked and dated. The SPIRIT checklist is copyrighted by the SPIRIT

35 Group under the Creative Commons "[Attribution-NonCommercial-NoDerivs 3.0 Unported](https://creativecommons.org/licenses/by-nc-nd/3.0/)"

36 license.

37

38

39

40

41

42

43

44

45

46

47

48

49

50

51

52

53

54

55

56

57

58

59

60

# BMJ Open

## Erector Spinae Plane blocks for the Early Analgesia of Rib fractures in trauma (ESPEAR): protocol for a multicentre pilot randomised controlled trial with feasibility and embedded qualitative assessment

|                                 |                                                                                                                                                                                                                                                                                                                                                                                                                                                                                                                                                                                                                                                                                                                    |
|---------------------------------|--------------------------------------------------------------------------------------------------------------------------------------------------------------------------------------------------------------------------------------------------------------------------------------------------------------------------------------------------------------------------------------------------------------------------------------------------------------------------------------------------------------------------------------------------------------------------------------------------------------------------------------------------------------------------------------------------------------------|
| Journal:                        | <i>BMJ Open</i>                                                                                                                                                                                                                                                                                                                                                                                                                                                                                                                                                                                                                                                                                                    |
| Manuscript ID                   | bmjopen-2022-062935.R1                                                                                                                                                                                                                                                                                                                                                                                                                                                                                                                                                                                                                                                                                             |
| Article Type:                   | Protocol                                                                                                                                                                                                                                                                                                                                                                                                                                                                                                                                                                                                                                                                                                           |
| Date Submitted by the Author:   | 13-Aug-2022                                                                                                                                                                                                                                                                                                                                                                                                                                                                                                                                                                                                                                                                                                        |
| Complete List of Authors:       | Hewson, David; Nottingham University Hospitals NHS Trust, Department of Anaesthesia; University of Nottingham<br>Nightingale, Jessica; Nottingham University Hospitals NHS Trust, Trauma and Orthopaedics<br>Ogollah, Reuben; University of Nottingham University Park Campus, Nottingham Clinical Trials Unit<br>Ollivere, Benjamin; University of Nottingham, Trauma Outcomes Group<br>Costa, Matthew; Oxford University, Nuffield Department of Orthopaedics, Rheumatology, and Musculoskeletal Sciences<br>Craxford, Simon; University of Nottingham, Trauma and orthopaedics<br>Bates, Peter; Barts Health NHS Trust<br>Bedforth, Nigel; Nottingham University Hospitals NHS Trust, Department of Anaesthesia |
| <b>Primary Subject Heading</b>: | Anaesthesia                                                                                                                                                                                                                                                                                                                                                                                                                                                                                                                                                                                                                                                                                                        |
| Secondary Subject Heading:      | Anaesthesia, Surgery, Emergency medicine                                                                                                                                                                                                                                                                                                                                                                                                                                                                                                                                                                                                                                                                           |
| Keywords:                       | ANAESTHETICS, TRAUMA MANAGEMENT, PAIN MANAGEMENT, ACCIDENT & EMERGENCY MEDICINE                                                                                                                                                                                                                                                                                                                                                                                                                                                                                                                                                                                                                                    |
|                                 |                                                                                                                                                                                                                                                                                                                                                                                                                                                                                                                                                                                                                                                                                                                    |

SCHOLARONE™  
Manuscripts

1  
2  
3 Erector Spinae Plane blocks for the Early Analgesia of Rib fractures in trauma  
4  
5 (ESPEAR): protocol for a multicentre pilot randomised controlled trial with  
6  
7 feasibility and embedded qualitative assessment  
8  
9  
10  
11

12 David W Hewson,<sup>1,2</sup> Jessica Nightingale,<sup>3</sup> Reuben Ogollah,<sup>4</sup> Benjamin J Ollivere,<sup>2,5</sup> Matthew L Costa,<sup>6</sup> Simon  
13 Craxford,<sup>5</sup> Peter Bates,<sup>7</sup> Nigel M Bedforth.<sup>1,2</sup>  
14  
15  
16  
17

18 *1. Department of Anaesthesia, Queen's Medical Centre, Nottingham University Hospitals NHS Trust, NG7 2UH, UK*  
19

20 *2. Anaesthesia and Critical Care, Academic Unit of Injury, Recovery and Inflammation Sciences, School of Medicine,*  
21 *University of Nottingham, Nottingham NG7 2UH, UK*  
22

23 *3. Department of Orthopaedic Surgery, Queen's Medical Centre, Nottingham University Hospitals NHS Trust, NG7 2UH, UK*  
24

25 *4. Nottingham Clinical Trials Unit, Applied Health Research Building, University Park, University of Nottingham, NG7 2RD, UK*  
26

27 *5. Orthopaedic Trauma Surgery, Academic Unit of Injury, Inflammation and Recovery Science, School of Medicine, University*  
28 *of Nottingham, Nottingham NG7 2UH, UK*  
29

30 *6. Nuffield Department of Orthopaedics, Rheumatology and Musculoskeletal Sciences, University of Oxford, OX3 9DU, UK*  
31

32 *7. Department of Orthopaedic Trauma, Royal London Hospital, Bart's Health, London, E1 1FR.*  
33  
34  
35  
36  
37

38 **Corresponding author**

Dr David Hewson

david.hewson@nottingham.ac.uk

Department of Anaesthesia

C Floor, East Block

Queen's Medical Centre

Nottingham University Hospitals NHS Trust

Nottingham

NG7 2UH

United Kingdom

55 **Word count**

3859 words  
56  
57  
58  
59  
60

## ABSTRACT

### Introduction

Patients with rib fractures commonly experience significant acute pain and are at risk of hypoxia, retained secretions, respiratory failure and death. Effective analgesia improves these outcomes. There is widespread variation in analgesic treatments given to patients including oral, intravenous and epidural routes of administration. Erector spinae plane (ESP) blockade, a novel regional analgesic technique, may be effective, but high quality evidence is lacking.

### Methods & analysis

To determine if a definitive trial of ESP blockade in rib fractures is possible, we are conducting a multicentre, randomised controlled pilot study with feasibility and qualitative assessment. Fifty adult patients with rib fractures will be randomised in a 1:1 ratio to ESP blockade with multimodal analgesia or placebo ESP blockade with multimodal analgesia. Participants and outcome assessors will be blinded. The primary feasibility outcomes are recruitment rate, retention rate and trial acceptability assessed by interview.

### Ethics & dissemination

The study was approved by the Oxford B Research Ethics Committee on 22 February 2022 (REC reference 22/SC/0005). All participants will provide written consent. Trial results will be reported via peer-review and to grant funders.

### Registration details

ISRCTN: 49307616. Protocol version 1.2 dated 07/02/22.

## KEYWORDS

Rib fractures, chest trauma, regional anaesthesia, analgesia, erector spinae plane block.

## **STRENGTHS AND LIMITATIONS**

- There is widespread variation in the care of patients following rib fractures. The clinical effectiveness of ESP blocks and catheters in this patient group is unclear.
- This is a feasibility study with piloting of candidate clinical outcome measures to determine if a definitive trial is feasible; the present work alone cannot answer whether ESP blocks are an effective analgesic modality for patients with rib fractures.
- The study will test if an analgesic placebo arm is an acceptable methodological feature for participants, clinicians and investigators.
- The study uses a programmed-intermittent bolus (PIB) regime for local anaesthetic delivery, but the ideal dose and method of delivery for ESP blocks remains unknown. The study will not answer this question.
- The study used a double-blind design (patients and outcome assessors) and the effectiveness of blinding will be determined by patient and staff interviews.



## **INTRODUCTION**

The pain from rib fractures is often described by patients as the worst pain they have ever experienced. The major complication of this pain is that patients are unable to cough and breathe deeply, causing atelectasis, retained secretions, hypoxaemia, pneumonia and progressive respiratory failure. Deterioration may require mechanical ventilation on an intensive care unit and lead to death.[1,2] This morbidity and mortality is a direct result of severe pain and impaired gas exchange from underlying contused lung parenchyma and altered ventilatory mechanics from the bone injury.[3] The presence of rib fractures in trauma is associated with a significantly increased risk of death, regardless of other injuries, with an odds ratio of 1.4 (95% CI 1.3–1.6) for adults 18-45 years old and 2.5 (95% CI 2.3–2.8) for adults older than 64 years.[4] This injury is therefore particularly devastating for older adults who not only have a higher risk of death but are also likely to sustain rib fractures from less traumatic accidents (due to bone fragility), for example falling from standing height.[5]

A key objective in the multidisciplinary care of people with rib fractures is the assessment and treatment of pain to provide patient comfort and allow normal respiration and cough to minimise the risk of respiratory failure.[3,6] Alongside specialist physiotherapy and daily multidisciplinary review, good pain management is a vital element of early rib fracture care. Despite this, there is no agreement about the optimal pain relief to give patients. The literature on the use of the different analgesic techniques in rib fractures is inconclusive. Although national and international guidance recommends a multimodal approach in preference to opioid medications alone,[7] two meta-analyses concluded that the evidence to recommend any specific treatment modality is insufficient, and that there is no firm evidence for benefit or harm of one analgesic technique over another.[8,9] This leaves clinicians unsure of which analgesic techniques to use. National UK guidance specifies protocolised analgesic regimes as a standard of care for every patient with multiple rib fractures.[10] However the paucity of evidence meant that this guidance could not recommend which analgesic modality (epidural, peripheral nerve blocks or opioid) should be used in which clinical circumstances. Most patients with rib fractures are given a combination of analgesic drugs like paracetamol, non-steroidal anti-inflammatories, opioids and ketamine to help them cope with severe pain; these are the cornerstones of multimodal analgesia in this setting. Medication side effects (including nausea, pruritus, hallucinations, constipation, renal failure and respiratory depression) significantly limit their use. Some patients receive thoracic epidural analgesia (TEA) and some receive other forms of regional

1  
2 anaesthesia nerve blocks, but the delivery of these interventions by pain-specialist anaesthetists is  
3 driven more by local expertise and experience than by high quality evidence.[11]  
4  
5  
6  
7

8 Regional anaesthesia (including nerve blocks) are clinically useful following rib fractures due to their  
9 opioid sparing effect (therefore reducing serious drug related side-effects) and the superior dynamic  
10 pain relief they provide. Traditional techniques to block the thoracic nerve supply to the ribs include  
11 thoracic epidural analgesia (TEA), paravertebral blockade and intercostal blockade. Systematic review  
12 and meta-analysis of these techniques suggested that TEA provides good pain relief, however this  
13 benefit does not translate into superior outcomes such as occurrence of pulmonary complications and  
14 length of time spent in hospital, intensive care or requiring mechanical ventilation.[12] Unfortunately,  
15 TEA has a significant failure rate and is also associated with common and potentially catastrophic  
16 complications [13] leading to permanent paralysis, and is therefore contraindicated in approximately  
17 one fifth of people with significant injuries. TEA is a complex intervention to perform, practiced by a  
18 small and reducing number of anaesthetists nationally and is not available equitably to patients. Even  
19 within a single hospital the care delivered varies depending on the time of day and availability of staff  
20 to perform such a complex analgesic technique. Only an estimated 9.9-18.4% of patients receive TEA  
21 for rib fracture pain.[14]  
22  
23  
24  
25  
26  
27  
28  
29  
30  
31  
32  
33  
34  
35

36 The erector spinae plane (ESP) block is a regional anaesthetic technique involving the infiltration and  
37 infusion of local anaesthetic along fascial planes containing dorsal and ventral rami of thoracic spinal  
38 nerves supplying the chest wall.[15] The injection is performed away from the spinal cord (thereby  
39 avoiding the complications of TEA). ESP blocks were first described in 2016 [16] and have  
40 demonstrated analgesic efficacy for patients on enhanced recovery after surgery protocols (ERAS)  
41 following spinal,[17] breast,[18] thoracic [19] and cardiac surgery.[20] In these post-operative acute  
42 pain settings, ESP blocks have been shown to reduce patient-reported pain scores and opioid  
43 consumption significantly in the early post-operative period compared to multimodal analgesia  
44 regimes alone. However, the role of ESP blocks in the management of acute rib fracture pain is  
45 currently uncertain.[21] There are no experimental pragmatic multi- centre trials published in this  
46 setting, however single-centre cohort data demonstrates ESP blocks provide effective pain relief and  
47 improve respiratory function when added to multimodal analgesia in patients with rib fractures.[15,22]  
48 Higher quality clinical evidence is urgently needed to guide clinicians on whether the ESP block is a  
49 suitable addition to current multimodal analgesia in patients with rib fractures. A definitive trial on this  
50  
51  
52  
53  
54  
55  
56  
57  
58  
59  
60

1  
2 topic would promote evidence-based practice in rib fracture management and reduce unnecessary  
3 variation in clinical practice across UK trauma centres. However there is currently not enough evidence  
4 on the effectiveness and acceptability of ESP blocks for rib fractures to undertake a definitive  
5 randomised controlled trial (RCT).  
6  
7  
8  
9

10  
11 The aim of this study is therefore to determine if it is feasible to undertake a definitive RCT to establish  
12 if ESP blocks are a clinically effective early treatment for acute pain in patients hospitalised with rib  
13 fractures. Formal hypothesis testing for effectiveness or efficacy is not undertaken in feasibility studies.  
14 The aim of this trial is not to assess effectiveness or efficacy but to determine feasibility of progression  
15 to a definitive RCT.  
16  
17  
18  
19  
20  
21  
22  
23  
24  
25  
26  
27  
28  
29  
30  
31  
32  
33  
34  
35  
36  
37  
38  
39  
40  
41  
42  
43  
44  
45  
46  
47  
48  
49  
50  
51  
52  
53  
54  
55  
56  
57  
58  
59  
60

## METHODS AND ANALYSIS

### Objectives

This study has the primary objective of determining whether it is feasible to undertake a definitive RCT to establish if ESP blocks are a clinically effective early treatment for acute pain in patients hospitalised with rib fractures. Our primary objectives are to determine:

- Trial recruitment rate.
- Trial retention rate.
- Barriers and facilitators to recruitment and retention among participants and recruitment site staff (anaesthetists, allied health professionals, surgeons and research staff) with regard to the acceptability of the trial intervention.

Secondary trial objectives are:

- To determine the willingness of anaesthetists to randomise patients to intervention or control and willingness of potential participants to randomisation.
- To identify causes of protocol violation and trial withdrawal.
- To assess the completeness of data arising from the trial.
- To assess the fidelity of the trial intervention in terms of ESP catheter dislodgement, blockage or other technical failure.
- To assess the acceptability of the intervention to participants.
- To describe complications of the intervention.
- To pilot the collection of candidate outcome measures for a future definitive trial.
- To determine preliminary indicators of effectiveness as measured by candidate clinical outcome measures.

### Patient and Public involvement

The study question builds on previous qualitative work undertaken to validate a patient-derived recovery scale. The scale was developed following interviews with 50 patients and health professionals, with subsequent validation in a 250-patient study. This work characterised the

1  
2  
3  
4  
5  
6  
7  
8  
9  
10  
11  
12  
13  
14  
15  
16  
17  
18  
19  
20  
21  
22  
23  
24  
25  
26  
27  
28  
29  
30  
31  
32  
33  
34  
35  
36  
37  
38  
39  
40  
41  
42  
43  
44  
45  
46  
47  
48  
49  
50  
51  
52  
53  
54  
55  
56  
57  
58  
59  
60

experience of pain and breathing difficulties following rib fracture; identifying management of pain as a research priority for this patient population. The outcome scale developed through this study will be used as an outcome measure in this trial, to help capture patient-centered outcomes. Specifically for this study we have facilitated virtual focus groups with patients who have previously sustained rib fractures and were admitted to Nottingham University Hospitals NHS Trust. The groups discussed the following aspects: the question and study design; recruitment and consent; follow-up data collection; acceptability of blinding and preferred outcome measures. There was strong support for this study; with individuals acknowledging that pain management of non-operatively managed injuries was an important but often overlooked area of their care. A new regional anaesthetic technique was perceived to be valuable as a treatment option or adjunct since participants said they would be keen to avoid the side-effects associated with oral and intravenous analgesia. The ESP block was perceived by focus group members as less invasive than an epidural. The inclusion of a sham intervention was discussed and deemed acceptable given the integrity of the research. The proposed outcome measures were reviewed by participants and were felt to be comprehensive. They valued the addition of embedded qualitative work within the study to allow for holistic feedback about study acceptability for patients and staff.

### Population and setting

The target population is patients newly admitted to the MTC with one or more new rib fractures who can receive the trial intervention within 12 hours of admission to hospital. Participants will be recruited via their usual clinical care teams (emergency department, major trauma and/or acute pain services), who will notify study investigators of a potentially eligible participant for screening and recruitment purposes.

#### *Inclusion criteria:*

- Age  $\geq$  18
- New admission to major trauma centre and can receive trial intervention within 12 hours of admission
- Mechanism of injury blunt thoracic trauma
- Radiographic evidence of 1 or more new traumatic rib fractures

- 1  
2  
3 • Moderate or severe unilateral acute pain (defined as 11-point numerical rating scale (NRS) pain  
4 >4 when patient performing vital capacity breath or effective cough) at time of enrolment.  
5  
6 Patients may have bilateral fractures, but pain must be unilateral.  
7  
8  
9

10 *Exclusion Criteria:*

- 11  
12 • Patient refusal or inability to give informed written consent for any reason  
13  
14 • Thoracic injury requiring emergent operative or interventional radiology management  
15  
16 • Allergy to local anaesthetic  
17  
18 • Infection at site of ESP block  
19  
20 • Actual or estimated total body weight  $\leq 50$  kg thereby precluding safe dosing of local  
21 anaesthetic for ESP block  
22  
23  
24  
25  
26

27 **Interventions and blinding**

28  
29 Following written consent, participant randomisation will be performed to a 1:1 ratio using a web-  
30 based automated computer-generated minimisation algorithm with treatment groups balanced for:  
31 age, gender, polytrauma and unilateral or bilateral rib fractures. Other than the allocated intervention,  
32 both groups will be followed-up in the same way to exclude bias beyond procedures necessary for the  
33 allocation treatment. Randomisation will be to two groups:  
34  
35

- 36  
37  
38 1. ESP block and catheter plus multimodal analgesia (intervention)  
39  
40 2. Sham ESP block and catheter plus multimodal analgesia (control)  
41  
42  
43

44 *ESP block plus multimodal analgesia*

45  
46 Participants randomised to ESP block plus multimodal analgesia (intervention) will receive an US-  
47 guided ESP block and catheter targeting the vertebral transverse process corresponding to the mid-  
48 point of the consecutively fractured ribs on the side of pain. An initial fascial plane injection of 30ml of  
49 0.25% levo-bupivacaine will be placed, followed by catheter-delivered programmed-intermittent  
50 boluses of 15ml 0.125% levo-bupivacaine given every 3 hours with optional patient or clinician bolus of  
51 5ml every 1 hour.  
52  
53  
54  
55

56  
57 Participants allocated to intervention will additionally receive standard supportive care and  
58 multimodal analgesia according to British Orthopaedic Association 2016 guidelines. The site-specific  
59 adoption of multimodal analgesia regimes will be reviewed as part of the site feasibility.  
60

### *Sham ESP block plus multimodal analgesia*

Participants randomised to Sham ESP block plus multimodal analgesia (control) will receive a sham/placebo ultrasound-guided ESP block and catheter targeting the vertebral transverse process corresponding to the mid-point of the consecutively fractured ribs on the side of pain. A single 1ml subcutaneous injection of saline 0.9% will be made and a perineural catheter applied and affixed by skin-glue externally on the skin which will be dressed and connected to an infusion pump with patient-button which will remain turned off. Participants allocated to control will additionally receive standard supportive care and multimodal analgesia according to individual trial site protocol as per the intervention arm.

Participants in both arms will continue to receive multimodal analgesia as dictated by their usual clinical care team. Following ESPEAR enrolment, additional regional anaesthetic techniques (for example thoracic epidural insertion) will be undertaken at the discretion of the treating clinician, will be recorded in the trial CRF and will not lead to participant withdrawal.

### *Blinding*

Participants will be blinded to group allocation. Placebo effects are known to play a significant role on pain perception and patient expectation of analgesic efficacy; therefore it is important that a definitive trial include a placebo arm. This pilot RCT will test this blinding effectiveness as part of the feasibility embedded qualitative process analysis. Anaesthetists siting the ESP block or Sham ESP block will not be blind to group allocation, since this is not technically possible. Outcome assessors will be blind to group allocation. Blinding will be achieved by the infusion devices in both arms being stored in a black carry-case during the infusion.

### **Outcome measures**

#### *Primary Feasibility Outcomes:*

The primary feasibility outcomes, which will be measured to meet the objectives of this trial are:

- Recruitment rate. Defined as the number of eligible participants who consent to participate in the trial as a percentage of all eligible participants. This will be presented per centre per month and measured over the recruitment period (from randomisation of the first participant to

1  
2 randomisation of the final participant). The target recruitment rate is defined as recruitment of  
3  
4 50 participants from three recruiting centres, with each centre being open to recruitment for  
5  
6 12 months. This produces a mean trial target recruitment rate of 1.4 participants per centre per  
7  
8 month.

- 9  
10 • Retention rate. Defined as the proportion of randomised participants who complete 6-week  
11  
12 follow-up with valid candidate clinical outcomes data (see below).  
13  
14 • Barriers and facilitators to recruitment and retention among participants and recruitment site  
15  
16 staff (anaesthetists, allied health professionals, surgeons and research staff). This will be  
17  
18 assessed in the embedded qualitative study.  
19

### 20 21 *Secondary Feasibility Outcomes*

22  
23 The secondary feasibility outcomes are as follows:

- 24  
25  
26 • Trial eligibility rate. Defined as the proportion of those patients screened who were eligible for  
27  
28 enrolment in the trial.  
29  
30 • Trial consent rate. Defined as the proportion of eligible patients who provided written consent  
31  
32 for inclusion in the trial.  
33  
34 • Willingness of anaesthetists to randomise patients to intervention or control and willingness of  
35  
36 potential participants to randomisation. This will be achieved through qualitative evaluation,  
37  
38 including scrutiny of screening logs, completion of an open-ended survey with healthcare staff  
39  
40 and qualitative interviews with research staff conducted by the central research team.  
41  
42 • Causes of protocol violation. Causes will be identified from the Investigator Site File.  
43  
44

### 45 46 *Secondary Clinical Outcomes*

47  
48 The following clinical outcomes are considered secondary outcomes of the trial, and will be measured  
49  
50 to assess the relevance, completeness, and acceptability of these outcomes for use in a future  
51  
52 definitive RCT:

- 53  
54 • Static chest wall pain intensity. Measured on Short Form McGill Pain Questionnaire 2 (SF-MPQ-  
55  
56 2) to describe the worst pain experienced by the patient between the following eight time  
57  
58 points: 24 hours prior to receipt of the trial intervention (defined as trial baseline), then at 24,  
59  
60 48 and 72 hours. Scores will be described at each time interval in comparison to baseline and



1  
2  
3 summed to provide a cumulative static chest wall pain score. The time at which each measure  
4 is taken will also be recorded.

- 5  
6 • Functional (i.e. dynamic) chest wall pain intensity. Measured on a modified Functional Pain  
7 Scale (m-FPS) as the worst pain experienced by the patient during the following eight time  
8 points: 24 hours prior to receipt of the trial intervention (defined as trial baseline), then at 24,  
9 48 and 72 hours. The time at which each measure is taken will also be recorded. Scores will be  
10 described at each time interval in comparison to baseline and summed to provide a cumulative  
11 functional chest wall pain score. The m-FPS consists of the following Likert-scaled responses: 0  
12 = no pain; 1 = tolerable pain but able to perform vital capacity breath and effective cough; 2 =  
13 tolerable pain but prevents either vital capacity breath or effective cough; 3 = intolerable pain  
14 but can perform either vital capacity breath or effective cough; 4 = intolerable pain and unable  
15 to perform vital capacity breath or effective cough; 5 = intolerable and unable to verbally  
16 communicate due to pain.
- 17  
18 • Forced vital capacity, forced expiratory volume in one second and peak cough flow  
19 (Spirometry). Measured by bed-side portable spirometry. Measured immediately prior to  
20 receipt of trial intervention (defined as trial baseline), then at the following time points  
21 following receipt of intervention: 3 hours, 6 hours, 9 hours, 12 hours, 24 hours, 48 hours and 72  
22 hours.
- 23  
24 • Cumulative non-opioid analgesic consumption. The administration of the non-opioid analgesics  
25 paracetamol and non-steroidal anti-inflammatories will be measured as total doses  
26 administered in the 24 hours prior to receipt of the trial intervention (defined as trial baseline),  
27 then at the following time points following receipt of the intervention: 24 hours, 48 hours and  
28 72 hours.
- 29  
30 • Cumulative opioid analgesic consumption. The administration of the opioid analgesics will be  
31 measured as total dose administered in the 24 hours prior to receipt of the trial intervention  
32 (defined as trial baseline), then at the following time points following receipt of the  
33 intervention: 24 hours, 48 hours and 72 hours. All doses will be converted to morphine-  
34 equivalents for analysis.
- 35  
36 • Cumulative ketamine analgesic consumption. The administration of the ketamine will be  
37 measured as total dose administered in the 24 hours prior to receipt of the trial intervention  
38 (defined as trial baseline), then at the following time points following receipt of the  
39 intervention: 24 hours, 48 hours and 72 hours.

- 1  
2  
3  
4  
5  
6  
7  
8  
9  
10  
11  
12  
13  
14  
15  
16  
17  
18  
19  
20  
21  
22  
23  
24  
25  
26  
27  
28  
29  
30  
31  
32  
33  
34  
35  
36  
37  
38  
39  
40  
41  
42  
43  
44  
45  
46  
47  
48  
49  
50  
51  
52  
53  
54  
55  
56  
57  
58  
59  
60
- Additional procedures of regional anaesthesia following ESP block. The administration of the following additional procedures of regional anaesthesia will be recorded in the 24 hours prior to receipt of the trial intervention (defined as trial baseline), then at the following time points following receipt of the intervention: 24 hours, 48 hours and 72 hours: intercostal, pleural, serratus plane, non-trial erector-spinae, paravertebral and epidural blockade.
  - Opioid-related side-effects. The following opioid-related side-effects will be assessed immediately prior to receipt of trial intervention (defined as trial baseline) then at the following time points following receipt of intervention, 24 hours, 48 hours and 72 hours:
    - Constipation, defined as absence of bowel movement in the preceding 24 hour period.
    - Nausea or vomiting, scored on a 5-point scale (0 = no nausea or vomiting; 1 = mild nausea, no treatment required; 2 = nausea, anti-emetic administered; 3 = vomiting, anti-emetics administered; 4 = nausea or vomiting unresponsive to anti-emetic therapy).
    - Pruritis, scored on 11-point numerical rating scale.
    - Opioid-induced sedation, scored on Modified Observer's Assessment of Alertness/Sedation scale.
  - Oxygen requirement. Measured as maximum flow rate of supplemental oxygen administered to participant immediately prior to receipt of trial intervention (defined as trial baseline), then at the following time points following receipt of intervention, 3, 6, 9, 12, 24 hours, 48 hours and 72 hours.
  - Complications of regional anaesthesia. The following complications of regional anaesthesia will be assessed at 24 hours, 48 hours and 72 hours following receipt of intervention:
    - Treatment for local anaesthetic toxicity, defined as administration of intra-lipid therapy in the preceding 24 hour period.
    - Bleeding or infection at intervention insertion site.
    - Catheter dislodgement requiring re-sited intervention in preceding 24 hour period.
  - Condition-specific outcome measure. Measured on Outcomes after Chest Trauma Score (OCTS) to describe severity of rib-related symptoms (domains include mobility, breathing, activities, personal care, wellbeing and pain). The OCTS will be administered twice prior to receipt of trial intervention (defined as trial baseline) then at the following time points following receipt of intervention: 72 hours and 6 weeks.

- Diagnosis of pneumonia. Defined as administration of antibiotics for community- or hospital-acquired pneumonia assessed in the 24 hours prior to receipt of trial intervention (defined as trial baseline) then at the following time points following receipt of intervention, 24 hours, 48 hours and 72 hours and 6 weeks.
- Escalation of care to critical care. Defined as admission to Level 2 (HDU) or Level 3 (ICU) bed assessed in the 24 hours prior to receipt of trial intervention (defined as trial baseline) then at the following time points following receipt of intervention, 24 hours, 48 hours and 72 hours and 6 weeks.
- Length of hospital stay. Assessed 6 weeks following receipt of intervention.
- Quality of life measured on EQ-5D-5L. Assessed in the 24 hours prior to receipt of trial intervention (defined as trial baseline), then at 72 hours and 6 weeks following receipt of intervention.
- All-cause mortality. Assessed 6 weeks following receipt of intervention.

### Sample size calculation

Formal sample size calculation is not appropriate for feasibility studies. Currently there is no single agreed method for sample size for a feasibility trial, but most authors propose a sample size between 24 and 60 depending on the study aims.[23,24] To answer our key objectives, we aim to recruit 50 participants, allowing estimation of recruitment and retention rates with a margin of error of less than 10%.

### Statistical analysis

Data will be collected via REDCap database. Data analysis will primarily be descriptive to address the feasibility objectives of the trial. All analyses will be documented in a Statistical Analysis Plan which will be finalised prior to database lock. Feasibility outcomes will be estimated using descriptive statistics (with 95% confidence intervals [CI]) and will include screening rates, recruitment rates, follow-up rates, protocol adherence and amount of missing data for clinical outcomes. Key baseline characteristics (age, sex) will be compared between trial participants and the ineligible and non-consenting patients, to ascertain adequacy of inclusion/exclusion criteria and likely generalisability of the trial to the required targeted population. Similarly, we will compare the key patient characteristics between those

1  
2 followed-up and those lost to follow-up and investigate how similar this is across the treatment arms  
3  
4 to assess possible attrition bias in data collection. A baseline table will compare important  
5  
6 demographic and clinical characteristics between the two treatment arms. It is not a primary objective  
7  
8 of the feasibility trial to obtain definitive estimates of intervention effect on clinical outcomes and so  
9  
10 the clinical outcomes will be analysed descriptively. Additionally, we will use appropriate regression  
11  
12 method to estimate the likely range of intervention effects (point estimate and CIs) for key clinical  
13  
14 outcomes adjusted for minimisation variables. Reporting of the study will be according to the  
15  
16 CONSORT Statement: 2016 extension to randomised pilot and feasibility trials.[25]  
17  
18  
19  
20  
21  
22  
23  
24  
25  
26  
27  
28  
29  
30  
31  
32  
33  
34  
35  
36  
37  
38  
39  
40  
41  
42  
43  
44  
45  
46  
47  
48  
49  
50  
51  
52  
53  
54  
55  
56  
57  
58  
59  
60

For peer review only

## ETHICS AND DISSEMINATION

The study was granted approval by the Oxford B Research Ethics Committee on 22 February 2022 (REC reference 22/SC/0005). Substantial amendments that require review by REC will not be implemented until the REC grants a favourable opinion for the trial. All personal identifiable information collected during the trial will be coded, depersonalised with unique codes for each patient. The trial will be compliant with the requirements of the General Data Protection Regulation 2018 and the Data Protection Act 2018. The chief investigator and principal investigators at participating sites will have access to the full dataset. Relevant anonymized patient level data will be made available on reasonable request. Day-to-day trial management will be provided by the Trial Management Group, who will meet at least once per month. Independent oversight of trial conduct will be provided by a Trial Steering Committee, attended by the trial Chief-investigators and methodologist, with three independent members with expertise in trial methodology and statistics, anaesthesia and trauma care.

A manuscript for a high-impact peer-reviewed journal will be prepared. Authorship will be determined in accordance with ICMJE guidelines,[26] and other contributors will be acknowledged. The results of this project will be disseminated to patients through local mechanisms at all participating centres.

## **AUTHOR'S CONTRIBUTIONS**

DWH conceived the study, refined the study design, is responsible for ongoing trial management and wrote and approved this protocol. JN refined the study design, is responsible for ongoing trial management and wrote and approved this protocol. RO refined the study design, is responsible for ongoing trial management and wrote and approved this protocol. BJO conceived the study, is responsible for ongoing trial management and wrote and approved this protocol. NMB conceived the study, refined the study design, is responsible for ongoing trial management and wrote and approved this protocol. MLC refined the study design, is responsible for ongoing trial management and wrote and approved this protocol. SC and PB are responsible for ongoing trial management and wrote and approved this protocol.

## **FUNDING STATEMENT**

This work was funded by the National Institute for Health Research (NIHR) (Research for Patient Benefit programme Call 42, [project reference: NIHR202195]). The views expressed are those of the authors and not necessarily those of the NIHR or the UK Department of Health and Social Care.

## **COMPETING INTERESTS**

MLC is an NIHR Senior Investigator. The remaining authors declare no competing interests.

## **REFERENCES**

1. Ahn Y, Görlinger K, Alam HB, et al. Pain-associated respiratory failure in chest trauma. *Anesthesiol* 2013;118:701–8.
2. Sirmali M, Türüt H, Topçu S, et al. A comprehensive analysis of traumatic rib fractures: morbidity, mortality and management. *Journal of Cardio-Thoracic Surgery* 2003;24:133-138.
3. May L, Macadmed M, Hillermann C, et al. Rib fracture management. *Br J Anaesth Educ* 2016;16:26–32.
4. Kent R, Woods W, Bostrom O. Fatality risk and the presence of rib fractures. *Ann Adv Automot Med* 2008;52:73-82.
5. Holcomb JB, McMullin NR, Kozar RA, et al. Morbidity from rib fractures increases after age 45. *J Am Coll Surg* 2003;196:549–55.
6. London Major Trauma System: management of elderly major trauma patients. 2021. Available at: <https://www.c4ts.qmul.ac.uk/downloads/2021-pan-london-major-trauma-system-management-of-older-trauma.-third-editionapril-2021.pdf>. Accessed 04 March 2022.
7. Galvagno SM, Smith CE, Varon AJ, et al. Pain management for blunt thoracic trauma: a joint practice management guideline from the eastern association for the surgery of trauma and trauma anesthesiology society. *J Trauma Acute Care Surg* 2016;81:936-951.
8. Carrier FM, Turgeon AF, Nicole PC, et al. Effect of epidural analgesia in patients with traumatic rib fractures: a systematic review and meta-analysis of randomized controlled trials. *Can J Anesth* 2009;56:230–42.
9. Duch P, Møller MH. Epidural analgesia in patients with traumatic rib fractures: a systematic review of randomised controlled trials. *Acta Anaesthesiol Scand* 2015;59:698–709.
10. British Orthopaedic Association Standards for Trauma and Orthopaedics (BOASTS). Available at: <https://www.boa.ac.uk/standards-guidance/boasts.html>. Accessed 04 March 2022.
11. El-Boghdadly K, Wiles MD. Regional anaesthesia for rib fractures: too many choices, too little evidence. *Anaesthesia* 2019;74:564–8.
12. Peek J, Smeeing DPJ, Hietbrink F, et al. Comparison of analgesic interventions for traumatic rib fractures: a systematic review and meta-analysis. *Eur J Trauma Emerg Surg* 2019;45:597-622.

13. Hewson DW, Bedforth NM, Hardman JG. Spinal cord injury arising in anaesthesia practice. *Anaesthesia*. 2018;73:43–50.
14. Beard I, Hillermann C, Beard E, et al. Multicenter longitudinal cross-sectional study comparing effectiveness of serratus anterior plane, paravertebral and thoracic epidural for the analgesia of multiple rib fractures. *Reg Anesth Pain Med* 2020;45:351–6.
15. Adhikary SD, Liu WM, Fuller E, et al. The effect of erector spinae plane block on respiratory and analgesic outcomes in multiple rib fractures: a retrospective cohort study. *Anaesthesia* 2019;74:585–93.
16. Forero M, Adhikary SD, Lopez H, et al. The erector spinae plane block. *Reg Anesth Pain Med* 2016;41:621–7.
17. Singh S, Choudhary NK, Lalin D, et al. Bilateral ultrasound-guided erector spinae plane block for postoperative analgesia in lumbar spine surgery: a randomized control trial. *J Neurosurg Anesthesiol* 2020;32:330–4.
18. Gürkan Y, Aksu C, Kuş A, et al. Ultrasound guided erector spinae plane block reduces postoperative opioid consumption following breast surgery: a randomized controlled study. *J Clin Anesth* 2018;50:65–8.
19. Ciftci B, Ekinçi M, Celik EC, et al. Efficacy of an ultrasound-guided erector spinae plane block for postoperative analgesia management after video-assisted thoracic surgery: a prospective randomized study. *J Cardiothorac Vasc Anesth* 2020;34:444–9.
20. Macaire P, Ho N, Nguyen V, et al. Bilateral ultrasound-guided thoracic erector spinae plane blocks using a programmed intermittent bolus improve opioid-sparing postoperative analgesia in pediatric patients after open cardiac surgery: a randomized, double-blind, placebo-controlled trial. *Reg Anesth Pain Med* 2020;45:805–12.
21. El-Boghdady K, Pawa A. The erector spinae plane block: plane and simple. *Anaesthesia* 2017;72:434–8.
22. Hamilton D, Manickam B. Erector spinae plane block for pain relief in rib fractures. *Br J Anaesth* 2017;118:474–5.
23. Julious SA. Sample size of 12 per group rule of thumb for a pilot study. *Pharm Stat* 2005;4:287–91.
24. Teare MD, dimairo M, shephard N, et al. Sample size requirements to estimate key design parameters from external pilot randomised controlled trials: a simulation study. *Trials* 2014;15:1–13.



1  
2  
3 25. Eldridge SM, Chan CL, Campbell MJ, et al. Consort 2010 statement: extension to randomised pilot  
4 and feasibility trials. *Pilot Feasibility Stud* 2016;Article Number 64.

5  
6 <https://pilotfeasibilitystudies.biomedcentral.com/articles/10.1186/s40814-016-0105-8>. Accessed 04  
7  
8 March 2022.

9  
10 26. Recommendations for the conduct, reporting, editing and publication of scholarly work in medical  
11 journals. International Committee of Medical Journal Editors (ICMJE). Available at:

12  
13 <http://www.icmje.org>. Accessed 04 March 2022.  
14  
15  
16  
17  
18  
19  
20  
21  
22  
23  
24  
25  
26  
27  
28  
29  
30  
31  
32  
33  
34  
35  
36  
37  
38  
39  
40  
41  
42  
43  
44  
45  
46  
47  
48  
49  
50  
51  
52  
53  
54  
55  
56  
57  
58  
59  
60

1  
2  
3  
4  
5  
6  
7  
8  
9  
10  
11  
12  
13  
14  
15  
16  
17  
18  
19  
20  
21  
22  
23  
24  
25  
26  
27  
28  
29  
30  
31  
32  
33  
34  
35  
36  
37  
38  
39  
40  
41  
42  
43  
44  
45  
46  
47  
48  
49  
50  
51  
52  
53  
54  
55  
56  
57  
58  
59  
60

For peer review only

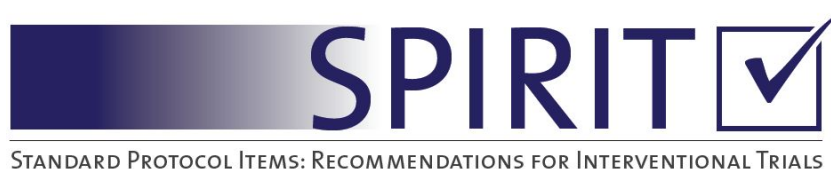

Erector Spinae Plane blocks for the Early Analgesia of Rib fractures in trauma (ESPEAR): protocol for a multicentre pilot randomised controlled trial with feasibility and embedded qualitative assessment

| Section/item                      | Item No | Description                                                                                                                                                                                                                                                                              | ESPEAR PROTOCOL PAGE |
|-----------------------------------|---------|------------------------------------------------------------------------------------------------------------------------------------------------------------------------------------------------------------------------------------------------------------------------------------------|----------------------|
| <b>Administrative information</b> |         |                                                                                                                                                                                                                                                                                          |                      |
| Title                             | 1       | Descriptive title identifying the study design, population, interventions, and, if applicable, trial acronym                                                                                                                                                                             | 1                    |
| Trial registration                | 2a      | Trial identifier and registry name. If not yet registered, name of intended registry                                                                                                                                                                                                     | 1                    |
|                                   | 2b      | All items from the World Health Organization Trial Registration Data Set                                                                                                                                                                                                                 | 1                    |
| Protocol version                  | 3       | Date and version identifier                                                                                                                                                                                                                                                              | 1                    |
| Funding                           | 4       | Sources and types of financial, material, and other support                                                                                                                                                                                                                              | 20                   |
| Roles and responsibilities        | 5a      | Names, affiliations, and roles of protocol contributors                                                                                                                                                                                                                                  | 1                    |
|                                   | 5b      | Name and contact information for the trial sponsor                                                                                                                                                                                                                                       | 16                   |
|                                   | 5c      | Role of study sponsor and funders, if any, in study design; collection, management, analysis, and interpretation of data; writing of the report; and the decision to submit the report for publication, including whether they will have ultimate authority over any of these activities | 20                   |

|    |                                                           |                                                          |              |
|----|-----------------------------------------------------------|----------------------------------------------------------|--------------|
| 1  |                                                           |                                                          |              |
| 2  |                                                           | 5d                                                       | 16           |
| 3  |                                                           | Composition, roles, and responsibilities of the          |              |
| 4  |                                                           | coordinating centre, steering committee, endpoint        |              |
| 5  |                                                           | adjudication committee, data management team,            |              |
| 6  |                                                           | and other individuals or groups overseeing the           |              |
| 7  |                                                           | trial, if applicable (see Item 21a for data monitoring   |              |
| 8  |                                                           | committee)                                               |              |
| 9  |                                                           |                                                          |              |
| 10 | <b>Introduction</b>                                       |                                                          |              |
| 11 |                                                           |                                                          |              |
| 12 | Background and                                            | 6a                                                       | 4-6          |
| 13 | rationale                                                 | Description of research question and justification       |              |
| 14 |                                                           | for undertaking the trial, including summary of          |              |
| 15 |                                                           | relevant studies (published and unpublished)             |              |
| 16 |                                                           | examining benefits and harms for each                    |              |
| 17 |                                                           | intervention                                             |              |
| 18 |                                                           |                                                          |              |
| 19 |                                                           | 6b                                                       | 10           |
| 20 |                                                           | Explanation for choice of comparators                    |              |
| 21 | Objectives                                                | 7                                                        | 8-9          |
| 22 |                                                           | Specific objectives or hypotheses                        |              |
| 23 | Trial design                                              | 8                                                        | 7            |
| 24 |                                                           | Description of trial design including type of trial (eg, |              |
| 25 |                                                           | parallel group, crossover, factorial, single group),     |              |
| 26 |                                                           | allocation ratio, and framework (eg, superiority,        |              |
| 27 |                                                           | equivalence, noninferiority, exploratory)                |              |
| 28 |                                                           |                                                          |              |
| 29 | <b>Methods: Participants, interventions, and outcomes</b> |                                                          |              |
| 30 |                                                           |                                                          |              |
| 31 | Study setting                                             | 9                                                        | 7            |
| 32 |                                                           | Description of study settings (eg, community clinic,     |              |
| 33 |                                                           | academic hospital) and list of countries where data      |              |
| 34 |                                                           | will be collected. Reference to where list of study      |              |
| 35 |                                                           | sites can be obtained                                    |              |
| 36 |                                                           |                                                          |              |
| 37 | Eligibility criteria                                      | 10                                                       | 8            |
| 38 |                                                           | Inclusion and exclusion criteria for participants. If    |              |
| 39 |                                                           | applicable, eligibility criteria for study centres and   |              |
| 40 |                                                           | individuals who will perform the interventions (eg,      |              |
| 41 |                                                           | surgeons, psychotherapists)                              |              |
| 42 |                                                           |                                                          |              |
| 43 | Interventions                                             | 11a                                                      | 9-10         |
| 44 |                                                           | Interventions for each group with sufficient detail to   |              |
| 45 |                                                           | allow replication, including how and when they will      |              |
| 46 |                                                           | be administered                                          |              |
| 47 |                                                           | 11b                                                      | 10           |
| 48 |                                                           | Criteria for discontinuing or modifying allocated        |              |
| 49 |                                                           | interventions for a given trial participant (eg, drug    |              |
| 50 |                                                           | dose change in response to harms, participant            |              |
| 51 |                                                           | request, or improving/worsening disease)                 |              |
| 52 |                                                           |                                                          |              |
| 53 |                                                           | 11c                                                      | Not provided |
| 54 |                                                           | Strategies to improve adherence to intervention          |              |
| 55 |                                                           | protocols, and any procedures for monitoring             |              |
| 56 |                                                           | adherence (eg, drug tablet return, laboratory tests)     |              |
| 57 |                                                           | 11d                                                      | 9-10         |
| 58 |                                                           | Relevant concomitant care and interventions that         |              |
| 59 |                                                           | are permitted or prohibited during the trial             |              |
| 60 |                                                           |                                                          |              |

|    |                      |    |                                                                                                                                                                                                                                                                                                                                                                                |              |
|----|----------------------|----|--------------------------------------------------------------------------------------------------------------------------------------------------------------------------------------------------------------------------------------------------------------------------------------------------------------------------------------------------------------------------------|--------------|
| 1  |                      |    |                                                                                                                                                                                                                                                                                                                                                                                |              |
| 2  | Outcomes             | 12 | Primary, secondary, and other outcomes, including the specific measurement variable (eg, systolic blood pressure), analysis metric (eg, change from baseline, final value, time to event), method of aggregation (eg, median, proportion), and time point for each outcome. Explanation of the clinical relevance of chosen efficacy and harm outcomes is strongly recommended | 10-14        |
| 3  |                      |    |                                                                                                                                                                                                                                                                                                                                                                                |              |
| 4  |                      |    |                                                                                                                                                                                                                                                                                                                                                                                |              |
| 5  |                      |    |                                                                                                                                                                                                                                                                                                                                                                                |              |
| 6  |                      |    |                                                                                                                                                                                                                                                                                                                                                                                |              |
| 7  |                      |    |                                                                                                                                                                                                                                                                                                                                                                                |              |
| 8  |                      |    |                                                                                                                                                                                                                                                                                                                                                                                |              |
| 9  |                      |    |                                                                                                                                                                                                                                                                                                                                                                                |              |
| 10 |                      |    |                                                                                                                                                                                                                                                                                                                                                                                |              |
| 11 |                      |    |                                                                                                                                                                                                                                                                                                                                                                                |              |
| 12 | Participant timeline | 13 | Time schedule of enrolment, interventions (including any run-ins and washouts), assessments, and visits for participants. A schematic diagram is highly recommended (see Figure)                                                                                                                                                                                               | 10           |
| 13 |                      |    |                                                                                                                                                                                                                                                                                                                                                                                |              |
| 14 |                      |    |                                                                                                                                                                                                                                                                                                                                                                                |              |
| 15 |                      |    |                                                                                                                                                                                                                                                                                                                                                                                |              |
| 16 |                      |    |                                                                                                                                                                                                                                                                                                                                                                                |              |
| 17 |                      |    |                                                                                                                                                                                                                                                                                                                                                                                |              |
| 18 |                      |    |                                                                                                                                                                                                                                                                                                                                                                                |              |
| 19 | Sample size          | 14 | Estimated number of participants needed to achieve study objectives and how it was determined, including clinical and statistical assumptions supporting any sample size calculations                                                                                                                                                                                          | 14           |
| 20 |                      |    |                                                                                                                                                                                                                                                                                                                                                                                |              |
| 21 |                      |    |                                                                                                                                                                                                                                                                                                                                                                                |              |
| 22 |                      |    |                                                                                                                                                                                                                                                                                                                                                                                |              |
| 23 |                      |    |                                                                                                                                                                                                                                                                                                                                                                                |              |
| 24 |                      |    |                                                                                                                                                                                                                                                                                                                                                                                |              |
| 25 |                      |    |                                                                                                                                                                                                                                                                                                                                                                                |              |
| 26 | Recruitment          | 15 | Strategies for achieving adequate participant enrolment to reach target sample size                                                                                                                                                                                                                                                                                            | Not provided |
| 27 |                      |    |                                                                                                                                                                                                                                                                                                                                                                                |              |
| 28 |                      |    |                                                                                                                                                                                                                                                                                                                                                                                |              |

### Methods: Assignment of interventions (for controlled trials)

#### Allocation:

|    |                                  |     |                                                                                                                                                                                                                                                                                                                                                          |    |
|----|----------------------------------|-----|----------------------------------------------------------------------------------------------------------------------------------------------------------------------------------------------------------------------------------------------------------------------------------------------------------------------------------------------------------|----|
| 31 |                                  |     |                                                                                                                                                                                                                                                                                                                                                          |    |
| 32 |                                  |     |                                                                                                                                                                                                                                                                                                                                                          |    |
| 33 | Sequence generation              | 16a | Method of generating the allocation sequence (eg, computer-generated random numbers), and list of any factors for stratification. To reduce predictability of a random sequence, details of any planned restriction (eg, blocking) should be provided in a separate document that is unavailable to those who enrol participants or assign interventions | 9  |
| 34 |                                  |     |                                                                                                                                                                                                                                                                                                                                                          |    |
| 35 |                                  |     |                                                                                                                                                                                                                                                                                                                                                          |    |
| 36 |                                  |     |                                                                                                                                                                                                                                                                                                                                                          |    |
| 37 |                                  |     |                                                                                                                                                                                                                                                                                                                                                          |    |
| 38 |                                  |     |                                                                                                                                                                                                                                                                                                                                                          |    |
| 39 |                                  |     |                                                                                                                                                                                                                                                                                                                                                          |    |
| 40 |                                  |     |                                                                                                                                                                                                                                                                                                                                                          |    |
| 41 |                                  |     |                                                                                                                                                                                                                                                                                                                                                          |    |
| 42 |                                  |     |                                                                                                                                                                                                                                                                                                                                                          |    |
| 43 |                                  |     |                                                                                                                                                                                                                                                                                                                                                          |    |
| 44 | Allocation concealment mechanism | 16b | Mechanism of implementing the allocation sequence (eg, central telephone; sequentially numbered, opaque, sealed envelopes), describing any steps to conceal the sequence until interventions are assigned                                                                                                                                                | 9  |
| 45 |                                  |     |                                                                                                                                                                                                                                                                                                                                                          |    |
| 46 |                                  |     |                                                                                                                                                                                                                                                                                                                                                          |    |
| 47 |                                  |     |                                                                                                                                                                                                                                                                                                                                                          |    |
| 48 |                                  |     |                                                                                                                                                                                                                                                                                                                                                          |    |
| 49 |                                  |     |                                                                                                                                                                                                                                                                                                                                                          |    |
| 50 |                                  |     |                                                                                                                                                                                                                                                                                                                                                          |    |
| 51 | Implementation                   | 16c | Who will generate the allocation sequence, who will enrol participants, and who will assign participants to interventions                                                                                                                                                                                                                                | 9  |
| 52 |                                  |     |                                                                                                                                                                                                                                                                                                                                                          |    |
| 53 |                                  |     |                                                                                                                                                                                                                                                                                                                                                          |    |
| 54 |                                  |     |                                                                                                                                                                                                                                                                                                                                                          |    |
| 55 | Blinding (masking)               | 17a | Who will be blinded after assignment to interventions (eg, trial participants, care providers, outcome assessors, data analysts), and how                                                                                                                                                                                                                | 10 |
| 56 |                                  |     |                                                                                                                                                                                                                                                                                                                                                          |    |
| 57 |                                  |     |                                                                                                                                                                                                                                                                                                                                                          |    |
| 58 |                                  |     |                                                                                                                                                                                                                                                                                                                                                          |    |
| 59 |                                  |     |                                                                                                                                                                                                                                                                                                                                                          |    |
| 60 |                                  |     |                                                                                                                                                                                                                                                                                                                                                          |    |

- 1  
2  
3  
4  
5  
6  
7
- 17b If blinded, circumstances under which unblinding is permissible, and procedure for revealing a participant's allocated intervention during the trial Not provided

8  
9  
10  
11  
12  
13  
14  
15  
16  
17  
18  
19

**Methods: Data collection, management, and analysis**

- 20  
21  
22  
23  
24  
25  
26  
27  
28  
29  
30  
31  
32  
33  
34  
35  
36  
37  
38  
39  
40  
41  
42  
43  
44  
45  
46  
47  
48
- Data collection methods 18a Plans for assessment and collection of outcome, baseline, and other trial data, including any related processes to promote data quality (eg, duplicate measurements, training of assessors) and a description of study instruments (eg, questionnaires, laboratory tests) along with their reliability and validity, if known. Reference to where data collection forms can be found, if not in the protocol 14
- 18b Plans to promote participant retention and complete follow-up, including list of any outcome data to be collected for participants who discontinue or deviate from intervention protocols Not provided
- Data management 19 Plans for data entry, coding, security, and storage, including any related processes to promote data quality (eg, double data entry; range checks for data values). Reference to where details of data management procedures can be found, if not in the protocol Not provided
- Statistical methods 20a Statistical methods for analysing primary and secondary outcomes. Reference to where other details of the statistical analysis plan can be found, if not in the protocol 14-15
- 20b Methods for any additional analyses (eg, subgroup and adjusted analyses) 14-15
- 20c Definition of analysis population relating to protocol non-adherence (eg, as randomised analysis), and any statistical methods to handle missing data (eg, multiple imputation) 14-15

49  
50

**Methods: Monitoring**

- 51  
52  
53  
54  
55  
56  
57  
58  
59  
60
- Data monitoring 21a Composition of data monitoring committee (DMC); summary of its role and reporting structure; statement of whether it is independent from the sponsor and competing interests; and reference to where further details about its charter can be found, if not in the protocol. Alternatively, an explanation of why a DMC is not needed 16

|    |                                 |     |                                                                     |
|----|---------------------------------|-----|---------------------------------------------------------------------|
| 1  |                                 |     |                                                                     |
| 2  |                                 | 21b | Description of any interim analyses and stopping 14+16              |
| 3  |                                 |     | guidelines, including who will have access to these                 |
| 4  |                                 |     | interim results and make the final decision to                      |
| 5  |                                 |     | terminate the trial                                                 |
| 6  |                                 |     |                                                                     |
| 7  | Harms                           | 22  | Plans for collecting, assessing, reporting, and 16                  |
| 8  |                                 |     | managing solicited and spontaneously reported                       |
| 9  |                                 |     | adverse events and other unintended effects of                      |
| 10 |                                 |     | trial interventions or trial conduct                                |
| 11 |                                 |     |                                                                     |
| 12 |                                 |     |                                                                     |
| 13 | Auditing                        | 23  | Frequency and procedures for auditing trial 16                      |
| 14 |                                 |     | conduct, if any, and whether the process will be                    |
| 15 |                                 |     | independent from investigators and the sponsor                      |
| 16 |                                 |     |                                                                     |
| 17 |                                 |     |                                                                     |
| 18 | <b>Ethics and dissemination</b> |     |                                                                     |
| 19 |                                 |     |                                                                     |
| 20 | Research ethics                 | 24  | Plans for seeking research ethics 16                                |
| 21 | approval                        |     | committee/institutional review board (REC/IRB)                      |
| 22 |                                 |     | approval                                                            |
| 23 |                                 |     |                                                                     |
| 24 | Protocol                        | 25  | Plans for communicating important protocol 16                       |
| 25 | amendments                      |     | modifications (eg, changes to eligibility criteria,                 |
| 26 |                                 |     | outcomes, analyses) to relevant parties (eg,                        |
| 27 |                                 |     | investigators, REC/IRBs, trial participants, trial                  |
| 28 |                                 |     | registries, journals, regulators)                                   |
| 29 |                                 |     |                                                                     |
| 30 |                                 |     |                                                                     |
| 31 | Consent or                      | 26a | Who will obtain informed consent or assent from 16                  |
| 32 | assent                          |     | potential trial participants or authorised surrogates,              |
| 33 |                                 |     | and how (see Item 32)                                               |
| 34 |                                 |     |                                                                     |
| 35 |                                 |     |                                                                     |
| 36 |                                 | 26b | Additional consent provisions for collection and N/A                |
| 37 |                                 |     | use of participant data and biological specimens in                 |
| 38 |                                 |     | ancillary studies, if applicable                                    |
| 39 |                                 |     |                                                                     |
| 40 | Confidentiality                 | 27  | How personal information about potential and 16                     |
| 41 |                                 |     | enrolled participants will be collected, shared, and                |
| 42 |                                 |     | maintained in order to protect confidentiality                      |
| 43 |                                 |     | before, during, and after the trial                                 |
| 44 |                                 |     |                                                                     |
| 45 |                                 |     |                                                                     |
| 46 | Declaration of                  | 28  | Financial and other competing interests for 20                      |
| 47 | interests                       |     | principal investigators for the overall trial and each              |
| 48 |                                 |     | study site                                                          |
| 49 |                                 |     |                                                                     |
| 50 | Access to data                  | 29  | Statement of who will have access to the final trial 20             |
| 51 |                                 |     | dataset, and disclosure of contractual agreements                   |
| 52 |                                 |     | that limit such access for investigators                            |
| 53 |                                 |     |                                                                     |
| 54 |                                 |     |                                                                     |
| 55 | Ancillary and                   | 30  | Provisions, if any, for ancillary and post-trial care, Not provided |
| 56 | post-trial care                 |     | and for compensation to those who suffer harm                       |
| 57 |                                 |     | from trial participation                                            |
| 58 |                                 |     |                                                                     |
| 59 |                                 |     |                                                                     |
| 60 |                                 |     |                                                                     |

|    |                   |     |                                                        |               |
|----|-------------------|-----|--------------------------------------------------------|---------------|
| 1  |                   |     |                                                        |               |
| 2  | Dissemination     | 31a | Plans for investigators and sponsor to                 | 20            |
| 3  | policy            |     | communicate trial results to participants,             |               |
| 4  |                   |     | healthcare professionals, the public, and other        |               |
| 5  |                   |     | relevant groups (eg, via publication, reporting in     |               |
| 6  |                   |     | results databases, or other data sharing               |               |
| 7  |                   |     | arrangements), including any publication               |               |
| 8  |                   |     | restrictions                                           |               |
| 9  |                   |     |                                                        |               |
| 10 |                   |     |                                                        |               |
| 11 |                   | 31b | Authorship eligibility guidelines and any intended     | 20            |
| 12 |                   |     | use of professional writers                            |               |
| 13 |                   |     |                                                        |               |
| 14 |                   | 31c | Plans, if any, for granting public access to the full  | 20            |
| 15 |                   |     | protocol, participant-level dataset, and statistical   |               |
| 16 |                   |     | code                                                   |               |
| 17 |                   |     |                                                        |               |
| 18 |                   |     |                                                        |               |
| 19 | <b>Appendices</b> |     |                                                        |               |
| 20 |                   |     |                                                        |               |
| 21 | Informed consent  | 32  | Model consent form and other related                   | Supplementary |
| 22 | materials         |     | documentation given to participants and authorised     | material      |
| 23 |                   |     | surrogates                                             |               |
| 24 |                   |     |                                                        |               |
| 25 |                   |     |                                                        |               |
| 26 | Biological        | 33  | Plans for collection, laboratory evaluation, and       | N/A           |
| 27 | specimens         |     | storage of biological specimens for genetic or         |               |
| 28 |                   |     | molecular analysis in the current trial and for future |               |
| 29 |                   |     | use in ancillary studies, if applicable                |               |
| 30 |                   |     |                                                        |               |

31

32 \*It is strongly recommended that this checklist be read in conjunction with the SPIRIT 2013

33 Explanation & Elaboration for important clarification on the items. Amendments to the

34 protocol should be tracked and dated. The SPIRIT checklist is copyrighted by the SPIRIT

35 Group under the Creative Commons "[Attribution-NonCommercial-NoDerivs 3.0 Unported](https://creativecommons.org/licenses/by-nc-nd/3.0/)"

36 license.

37

38

39

40

41

42

43

44

45

46

47

48

49

50

51

52

53

54

55

56

57

58

59

60
